# Supplementary material
Source: PubMed Central journal article supplement (PMC10922706)
Supplement: NIHMS1941510-supplement-Supplementary_Figures.pdf [file NIHMS1941510-supplement-Supplementary_Figures.pdf]

## **SUPPLEMENTARY FIGURES**

**Number of Supplemental Figures: 12.**

**Number of Supplemental Tables: 2.**

**Fig.S1****A**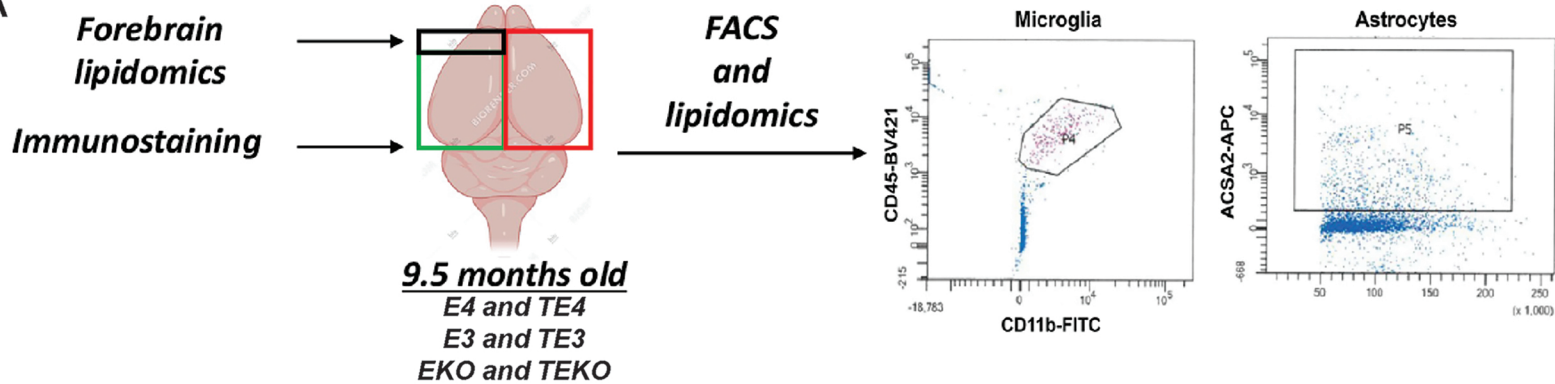**B**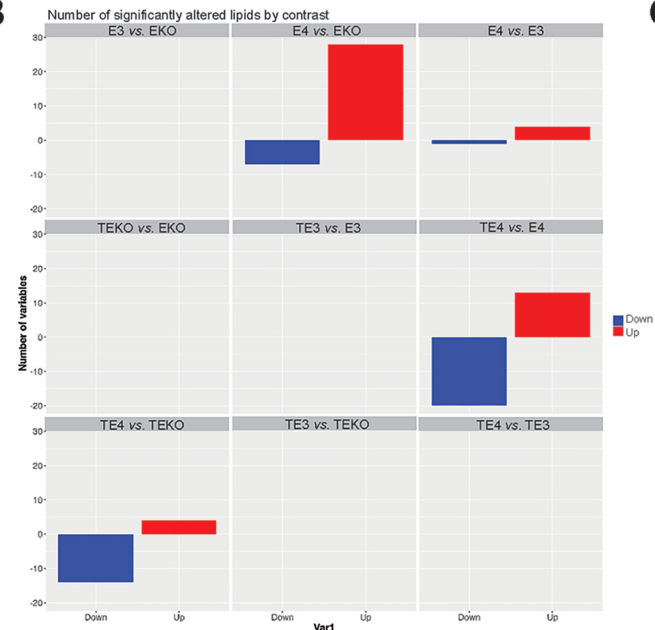**C**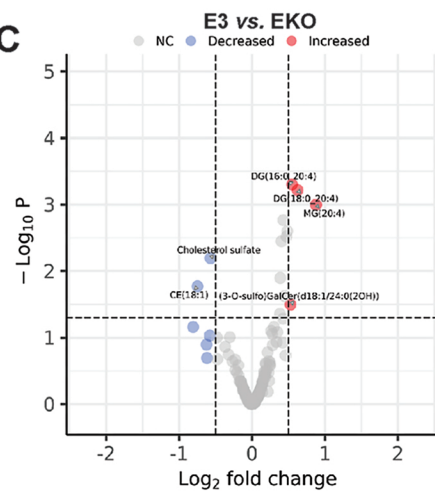**D**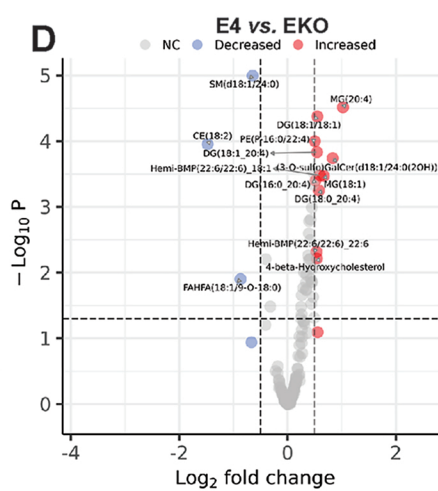**G**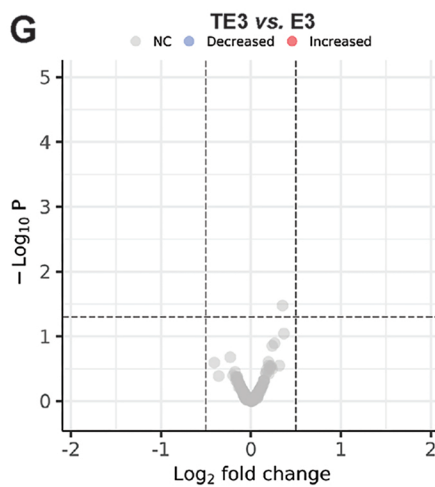**H**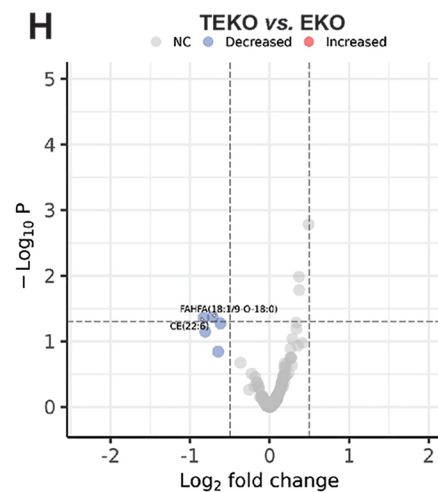**E****Concordance analysis of E4 vs. EKO and E3 vs. EKO**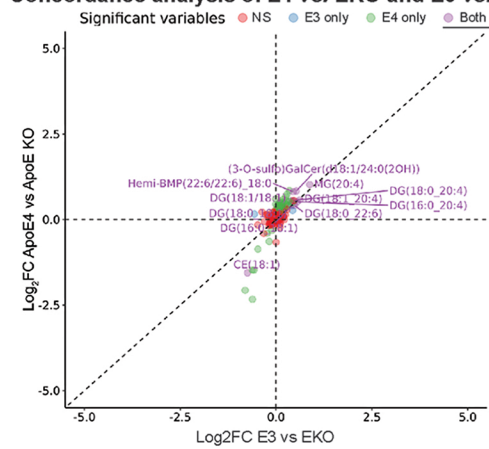**F****Concordance analysis of E4 vs. EKO and E3 vs. EKO**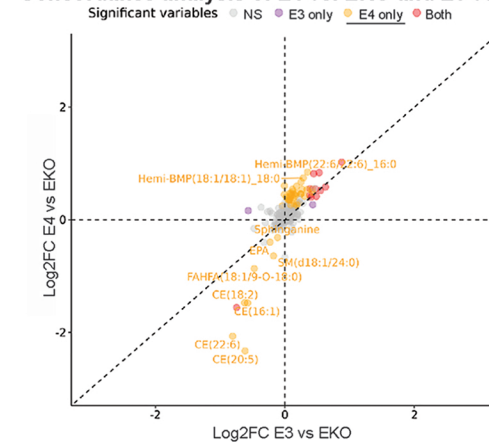**I**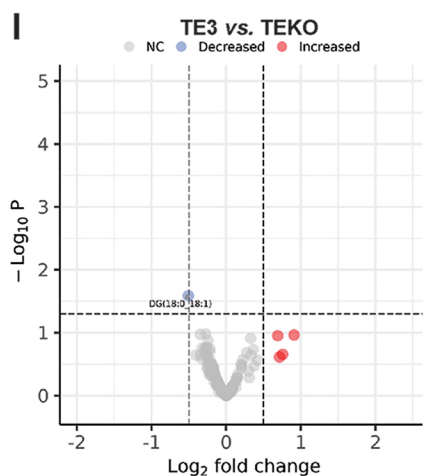**J**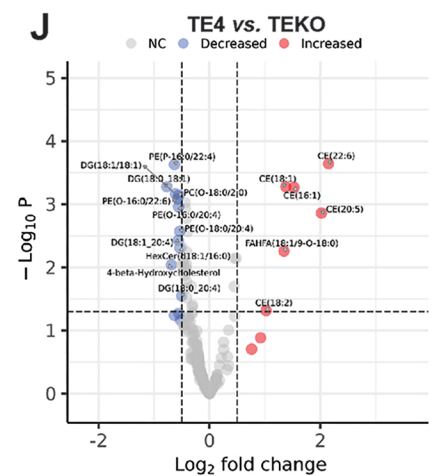



**Fig.S2**

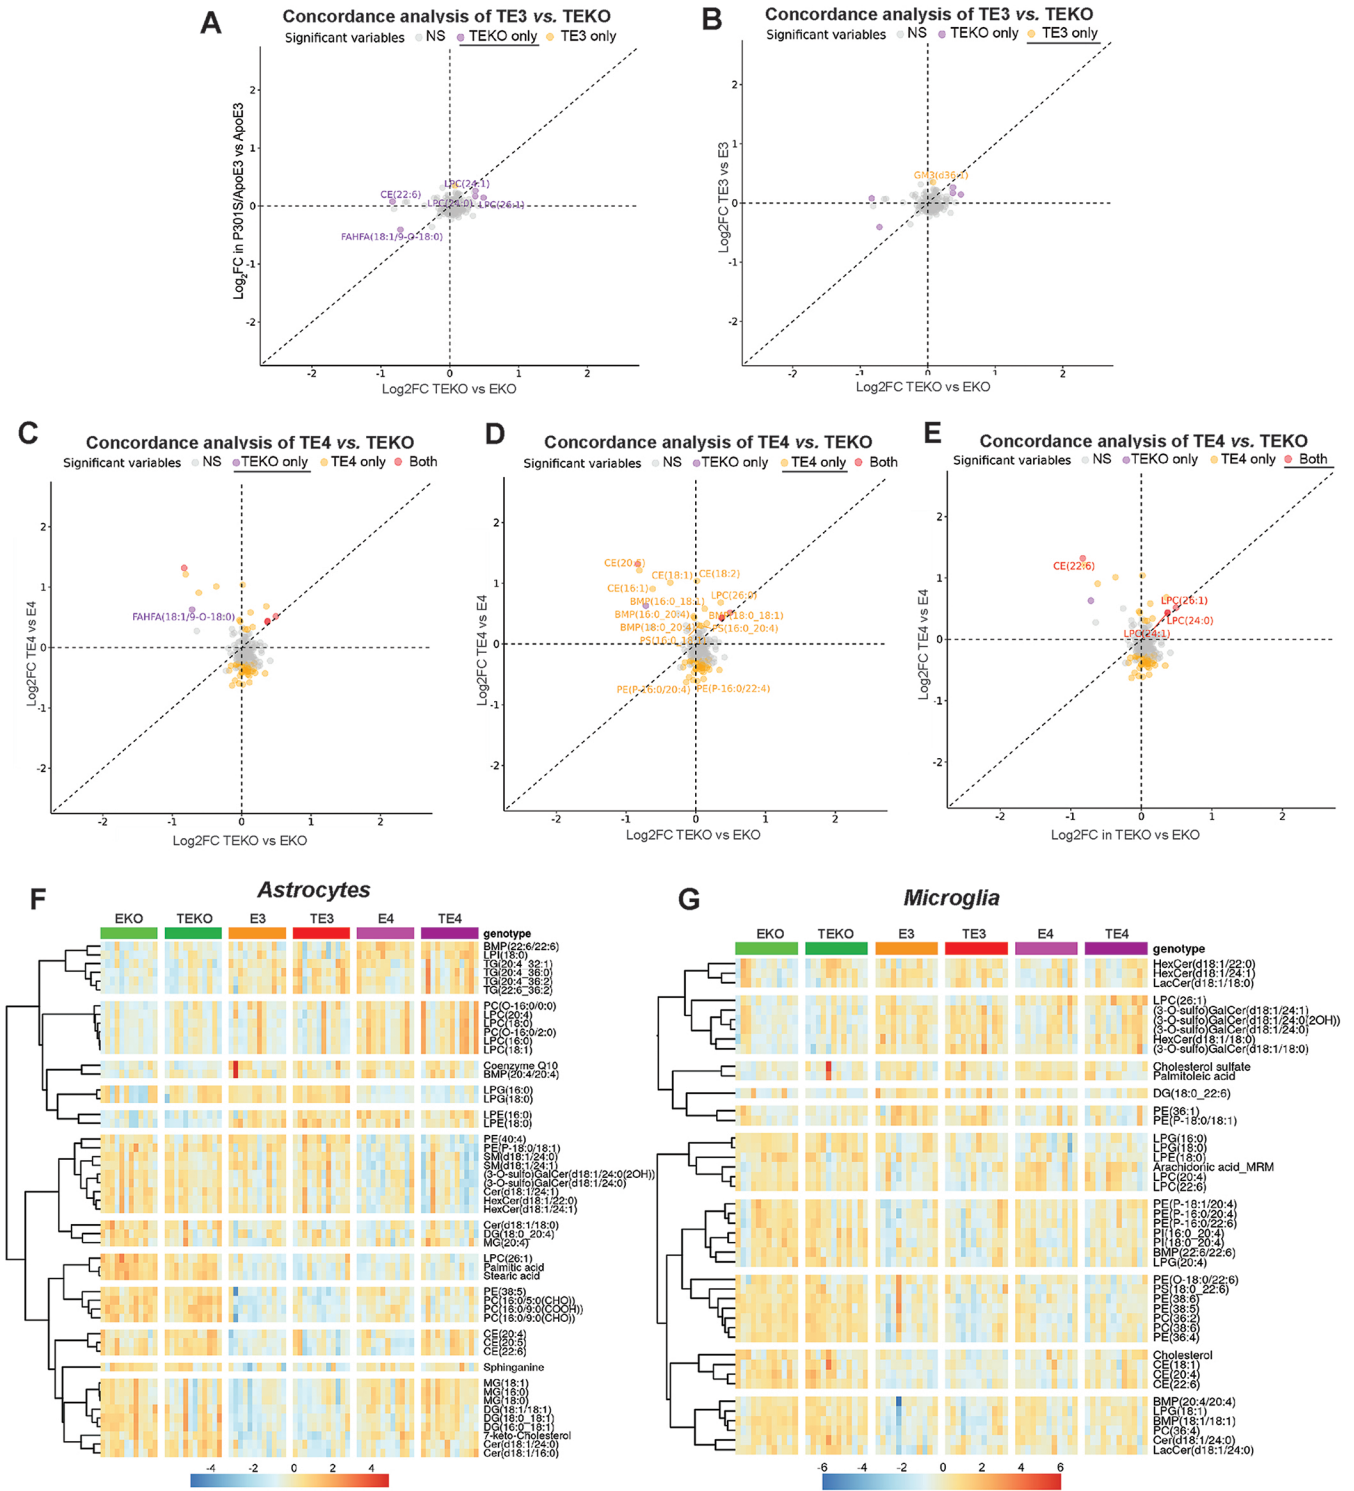

**Fig.S3**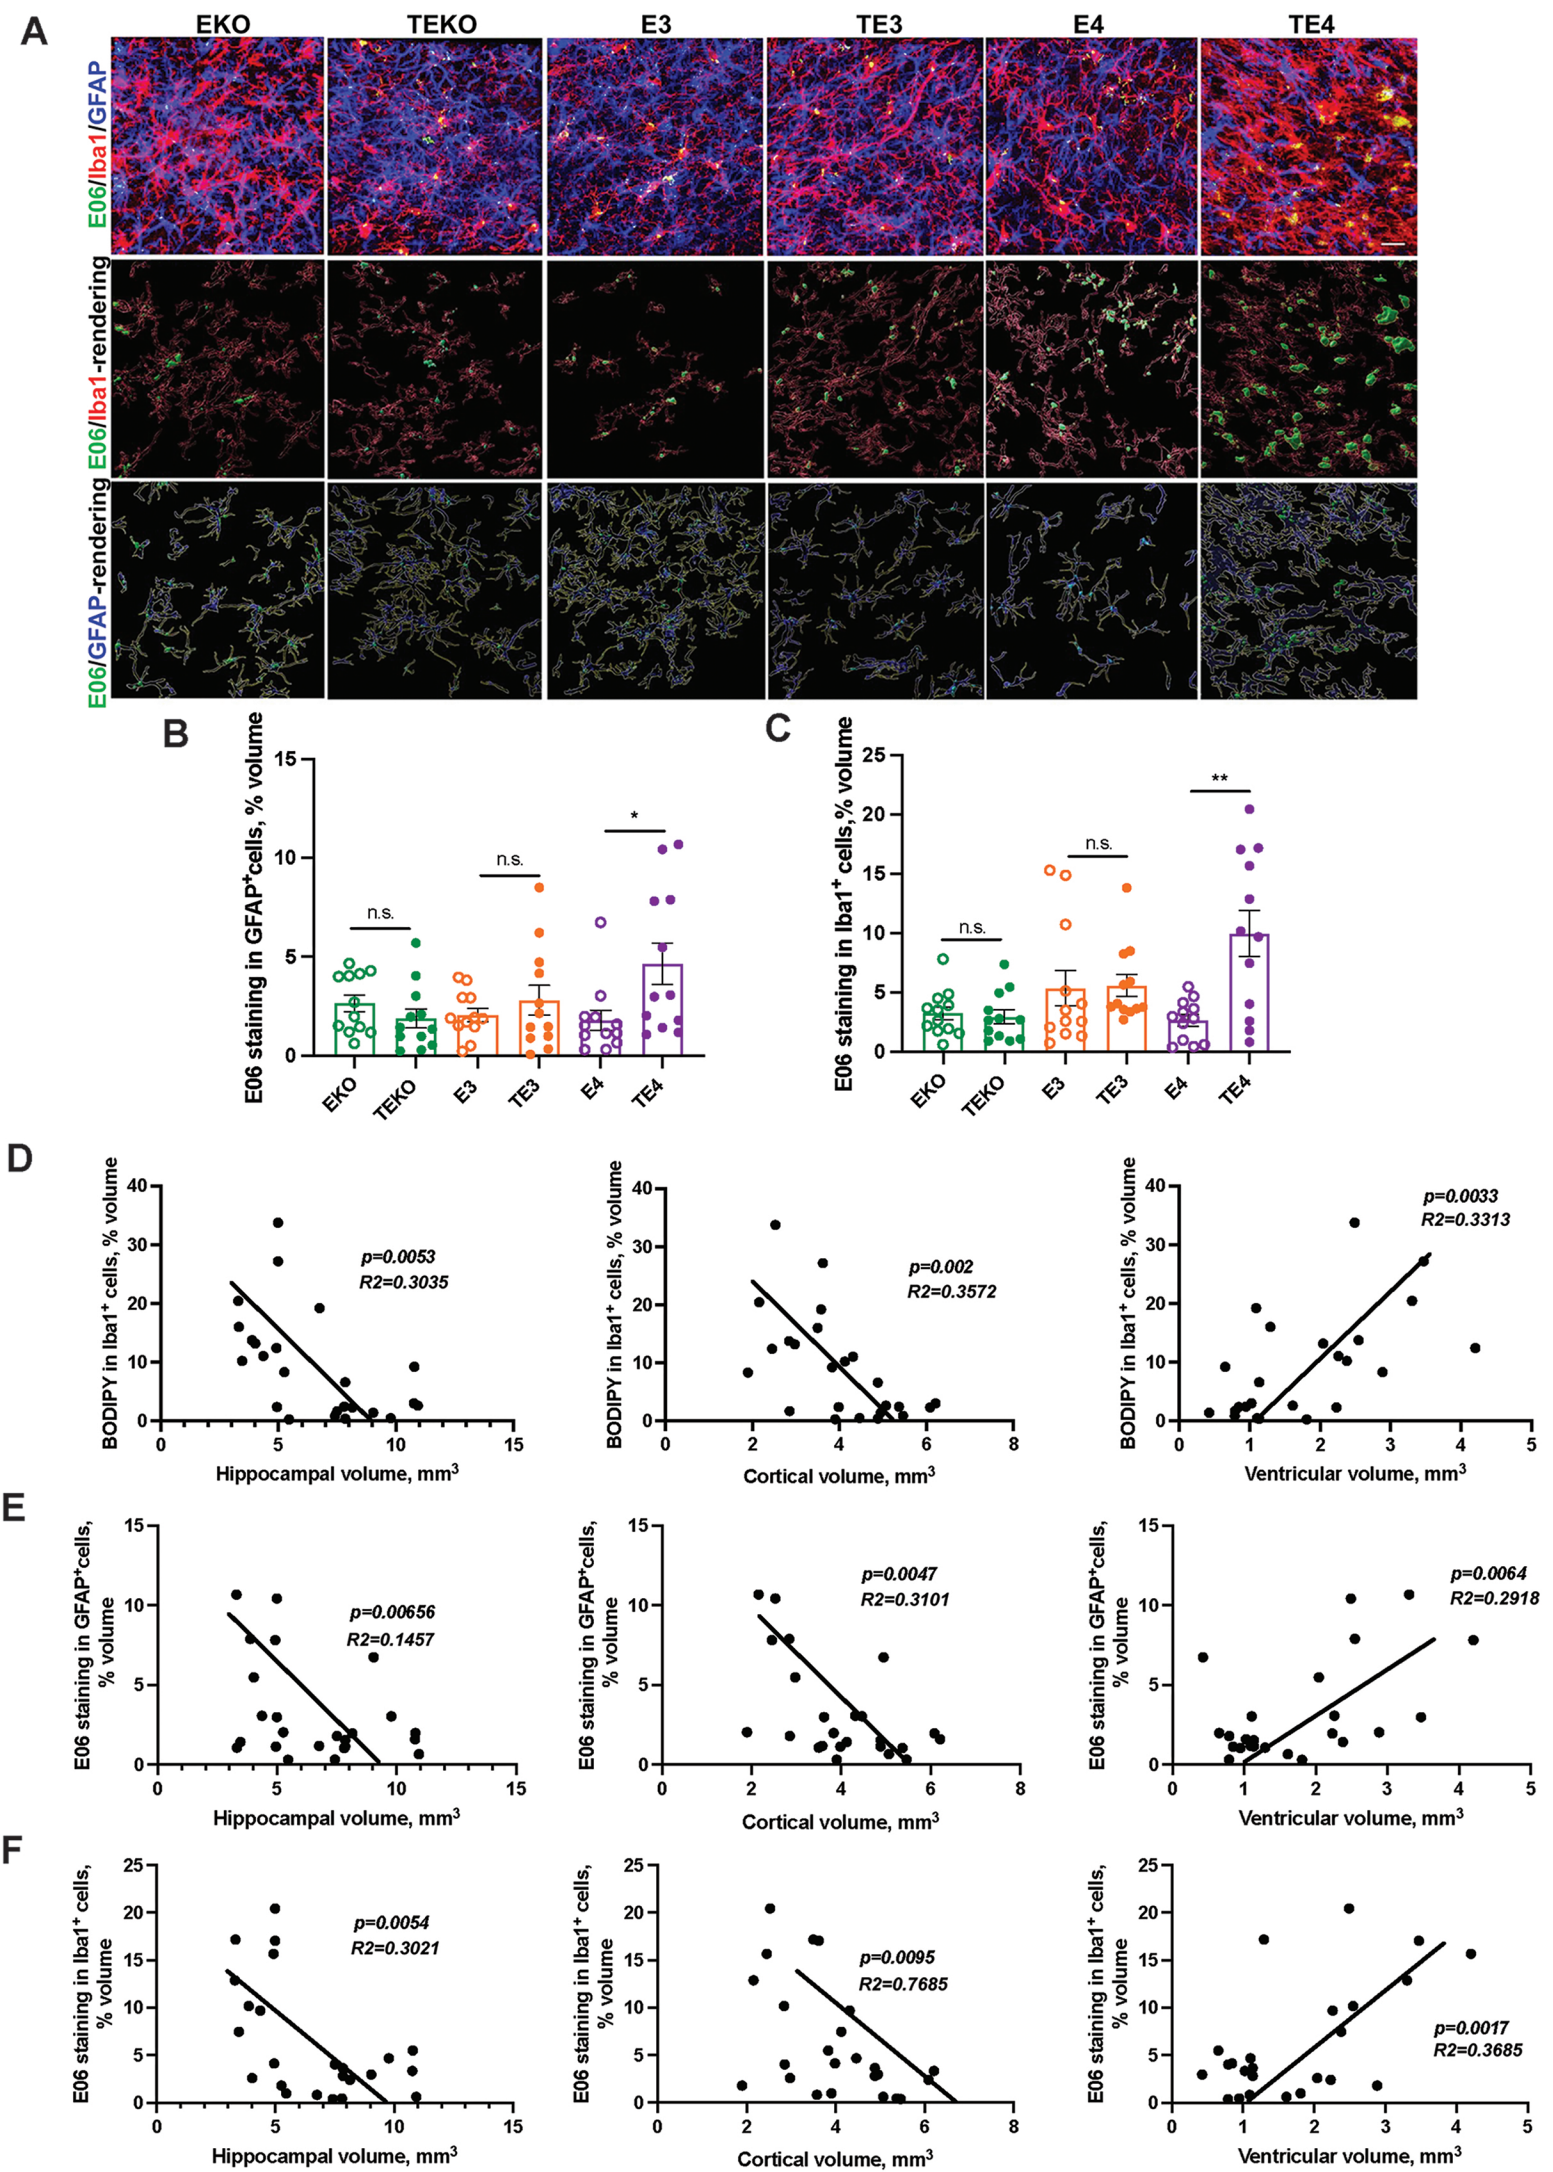



**Fig.S4**

**A**

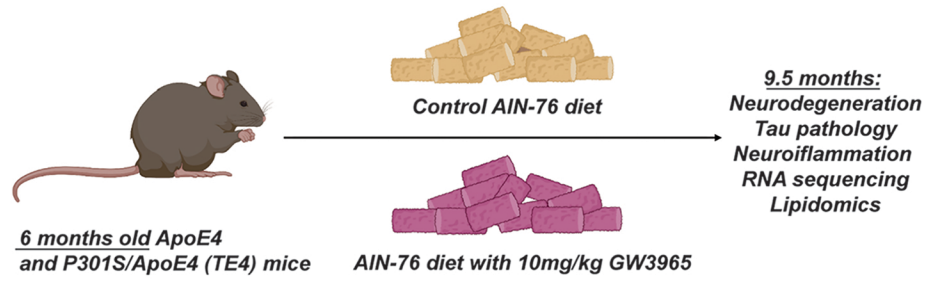

**B**

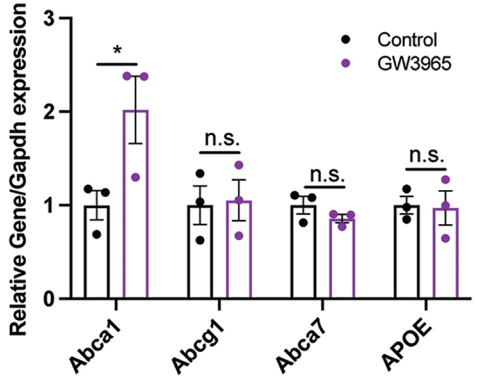

**C**

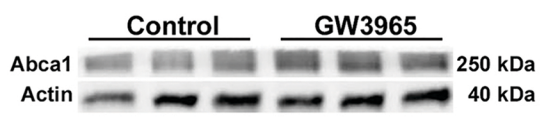

**D**

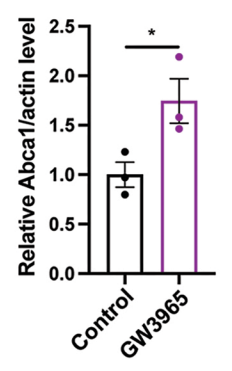

**E**

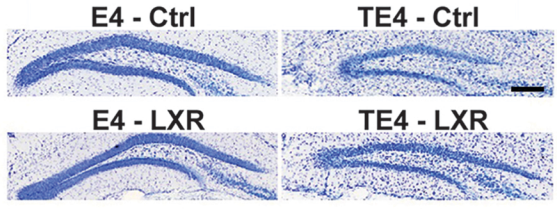

**F**

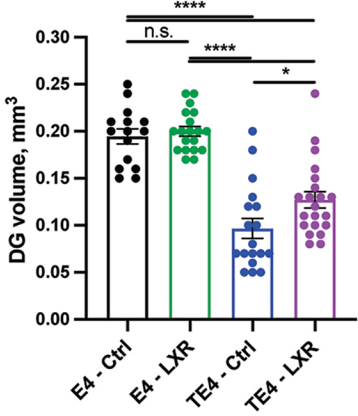

**G**

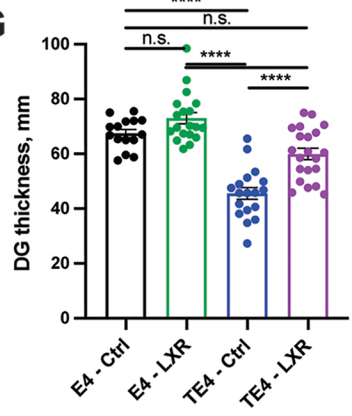

**H**

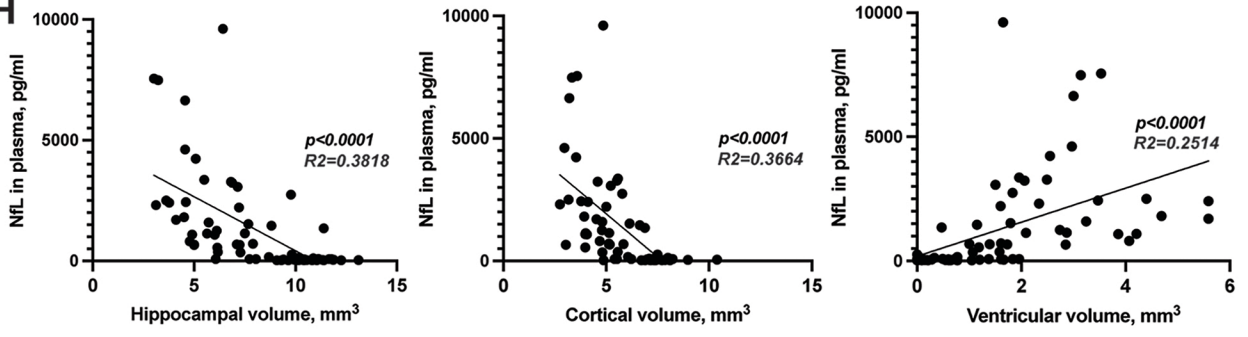

**I**

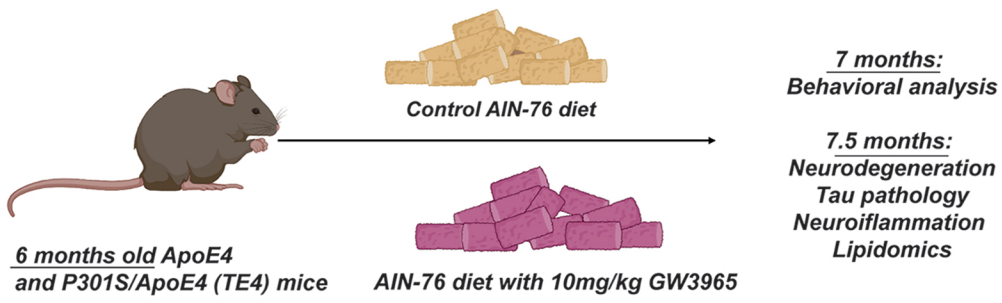

**J**

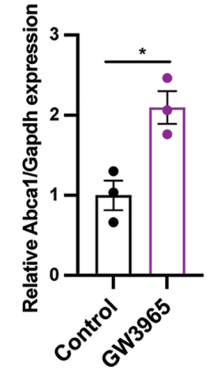

**Fig.S5**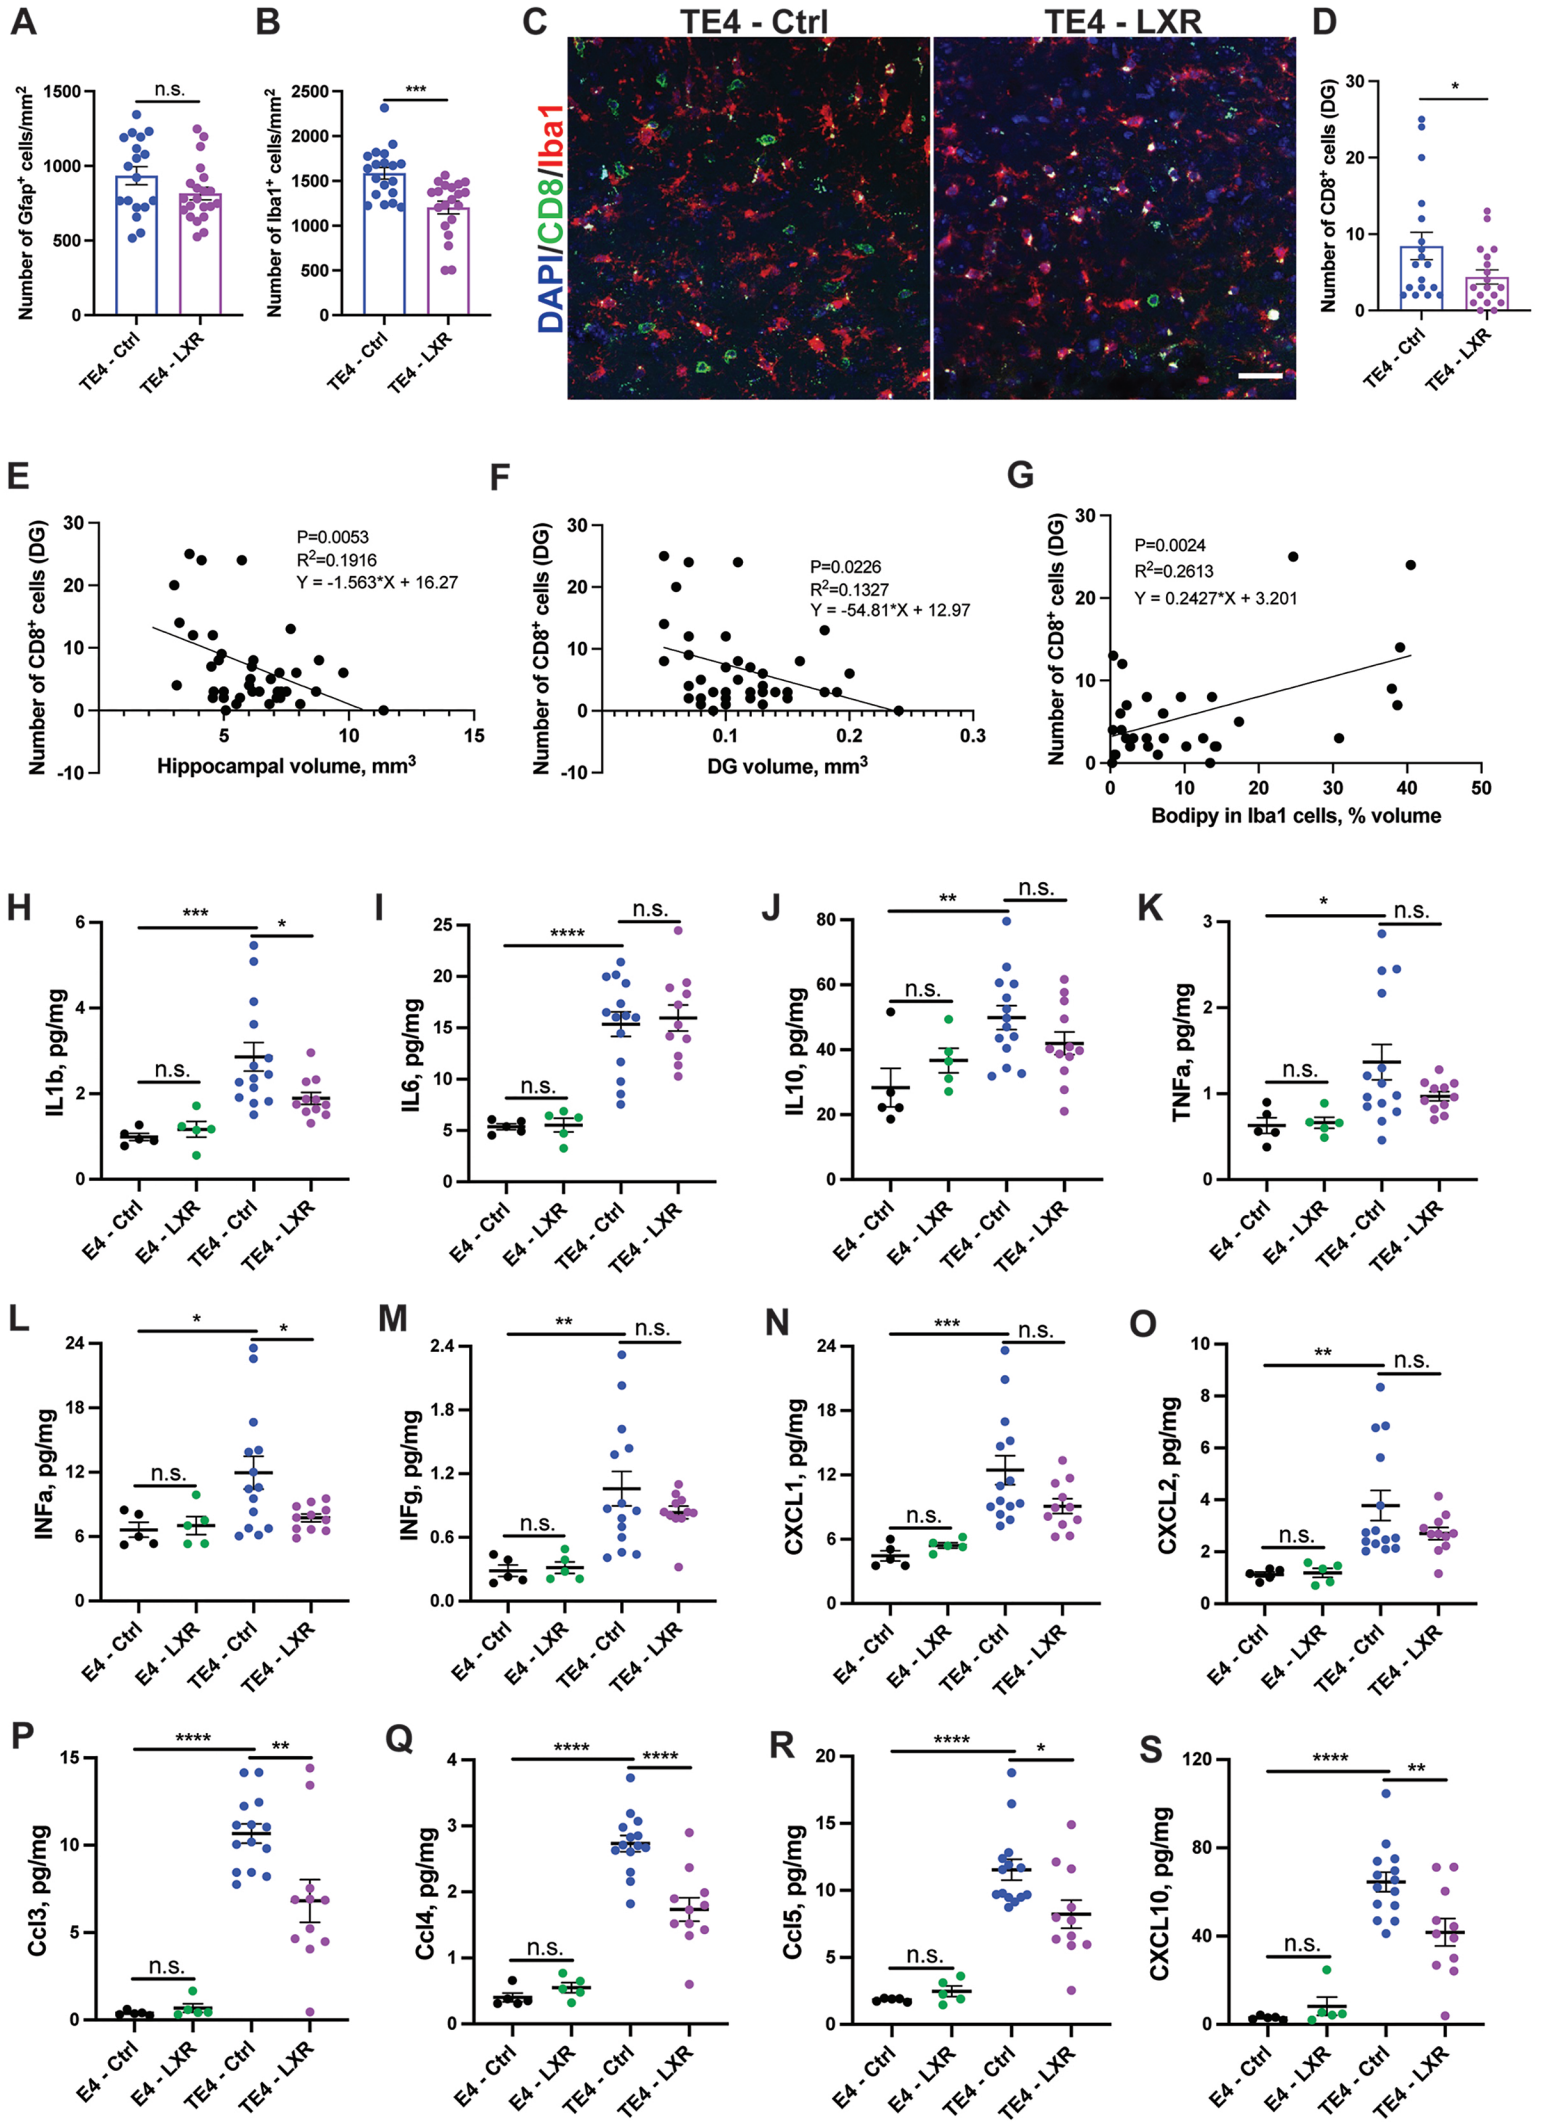

**Fig.S6****A**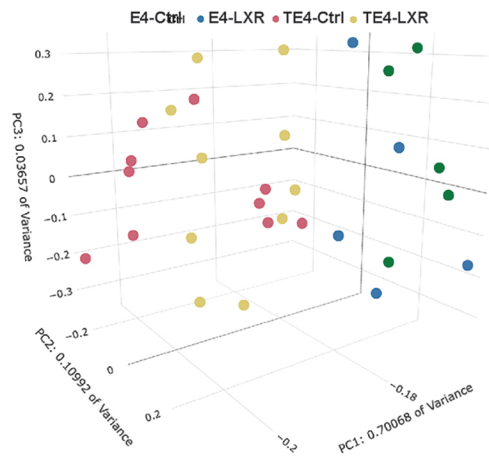**B**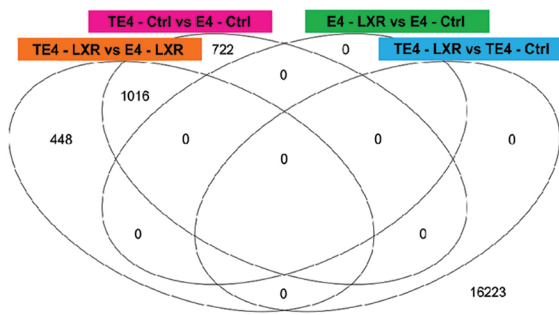**C**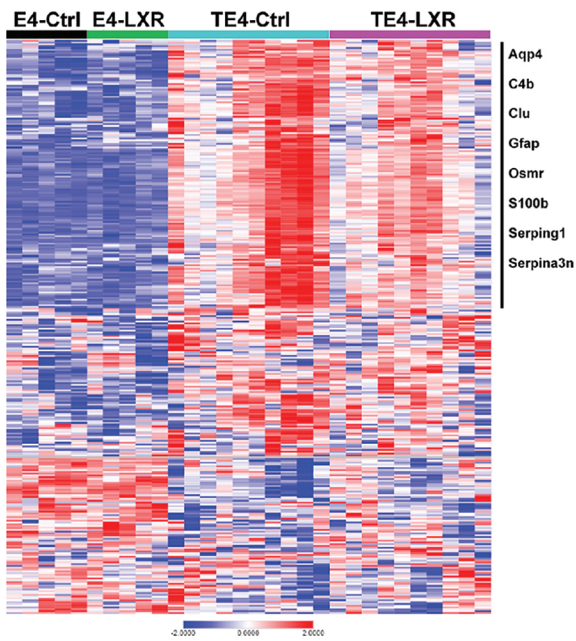**D**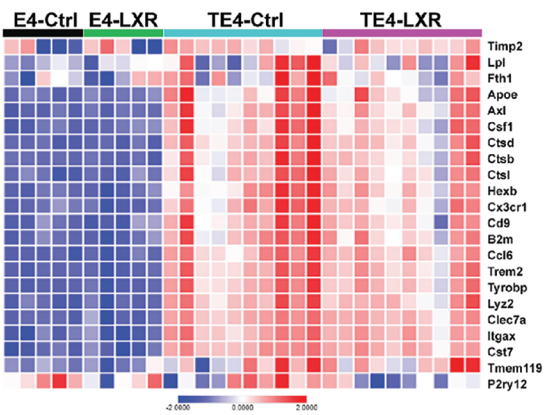**E**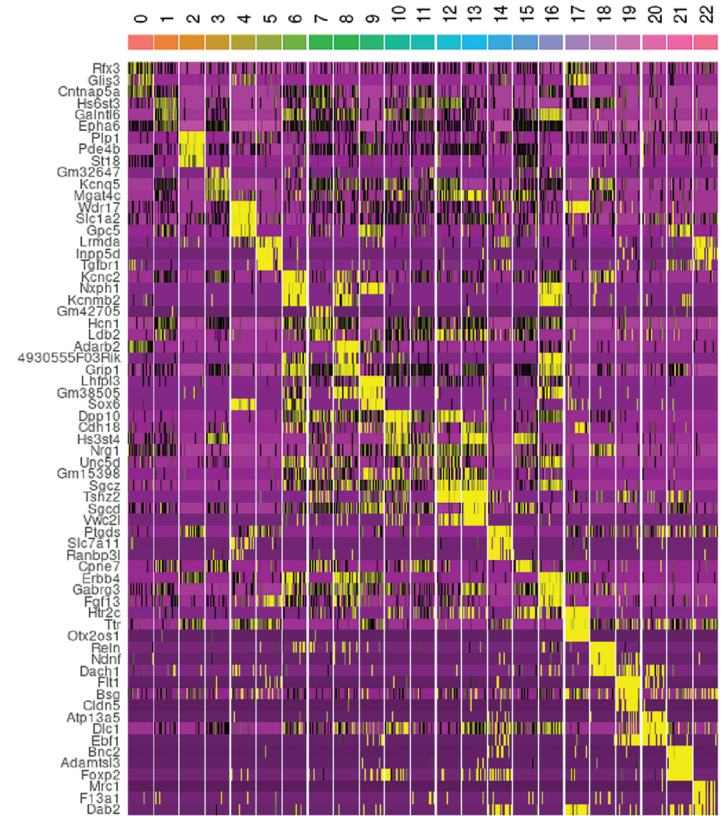**F**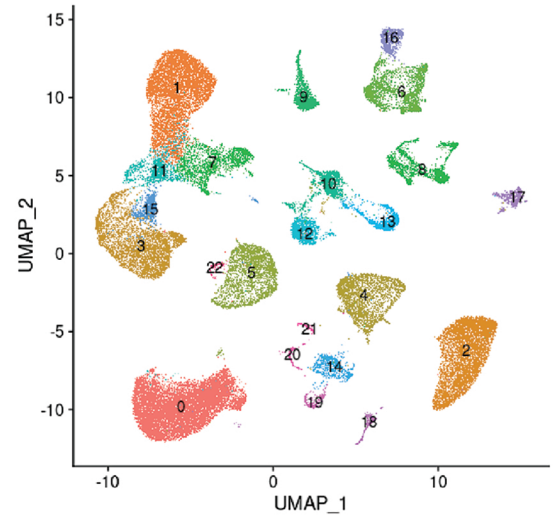**G**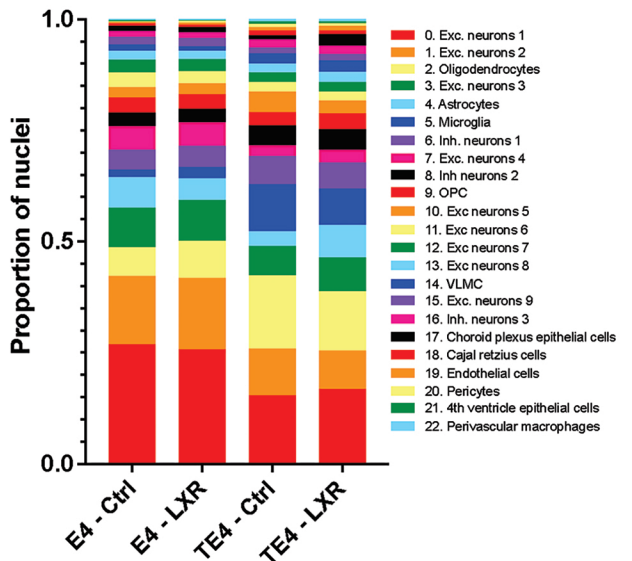



**Fig.S7**

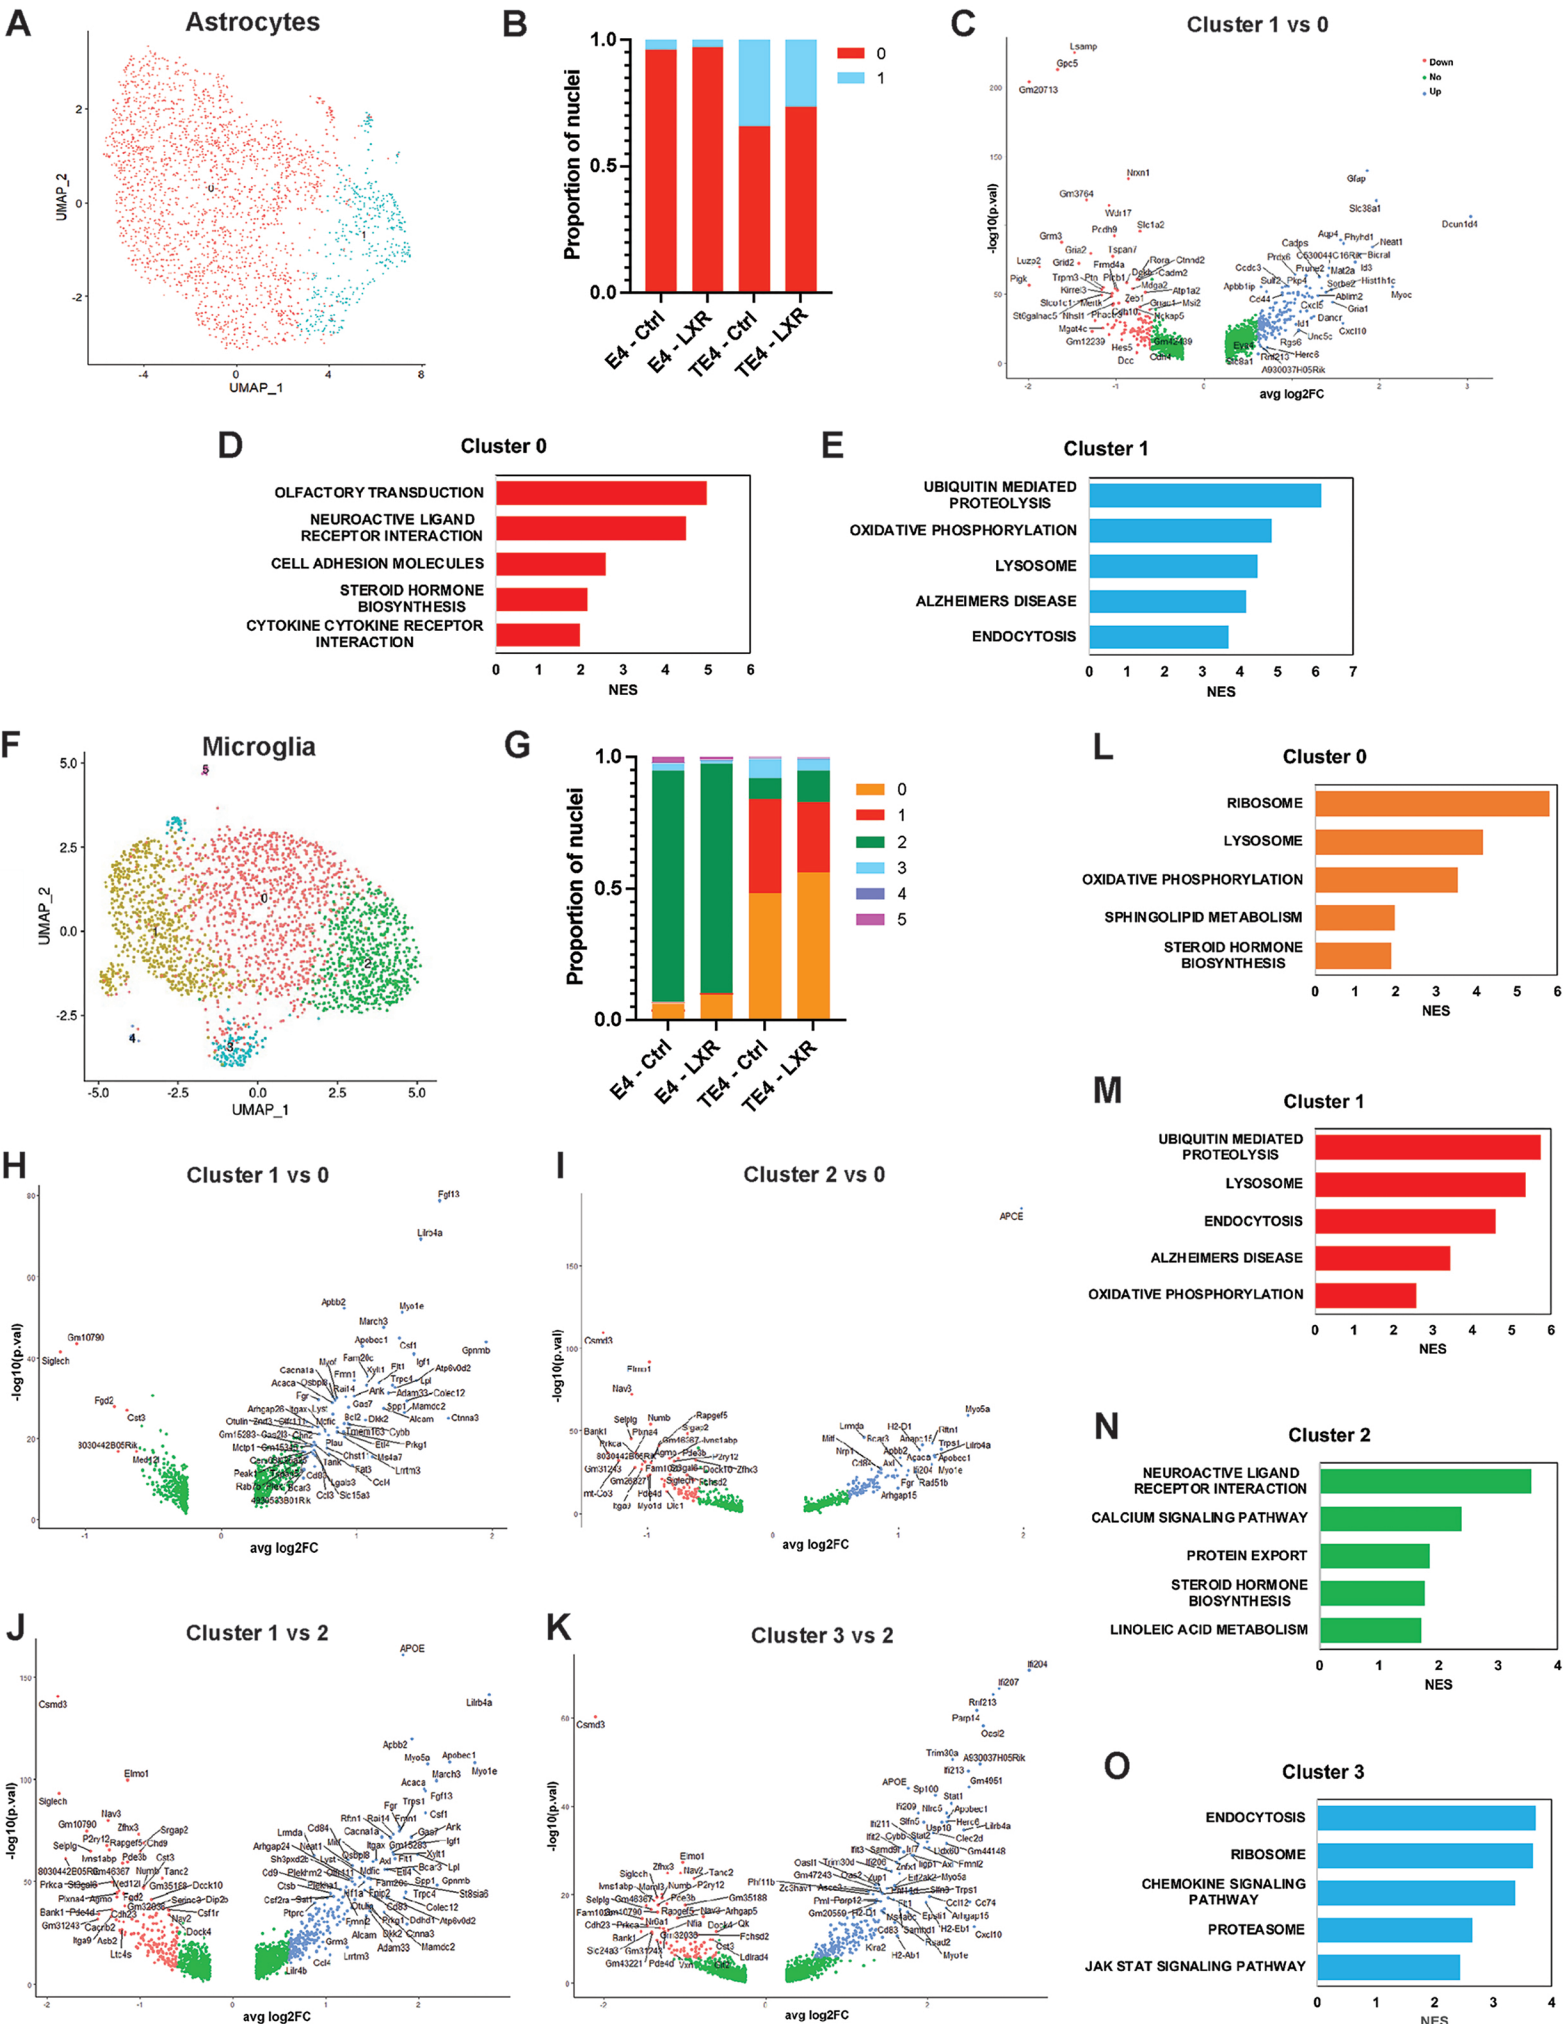

**Fig.S8**

**A**

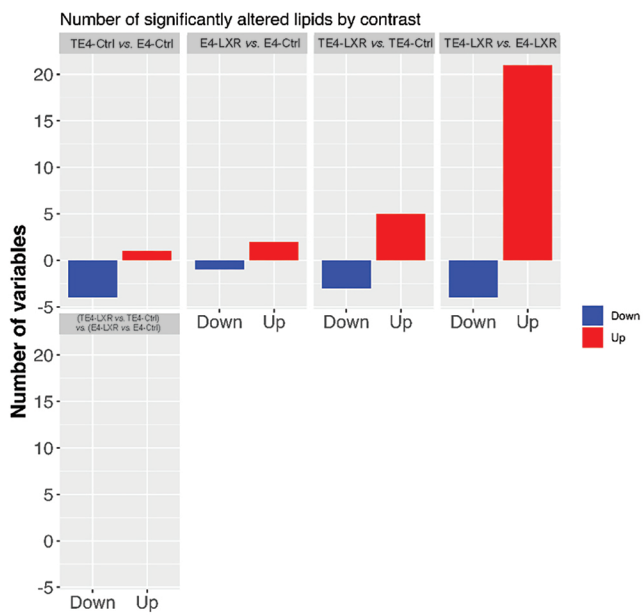

**B**

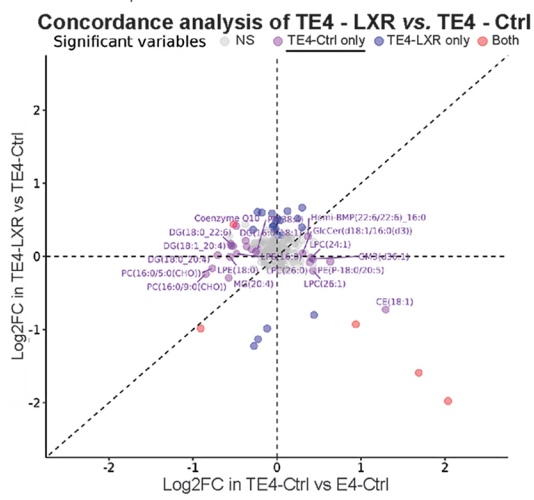

**C**

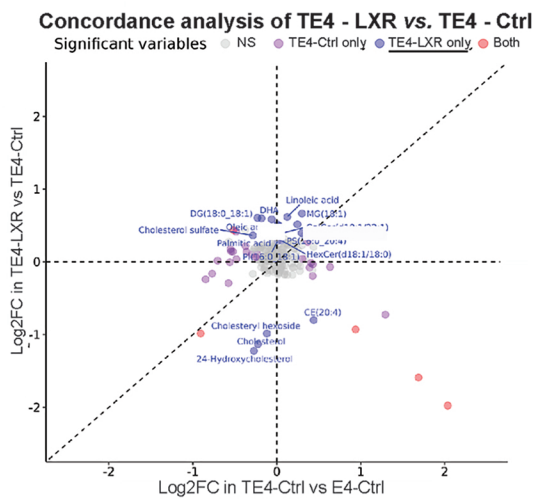

**D**

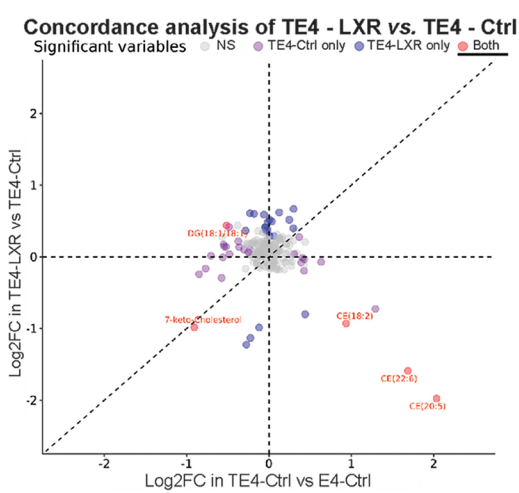

**E**

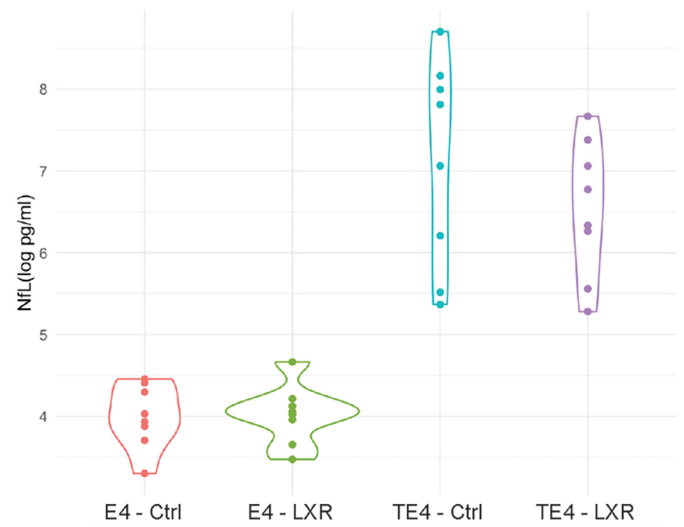

**F**

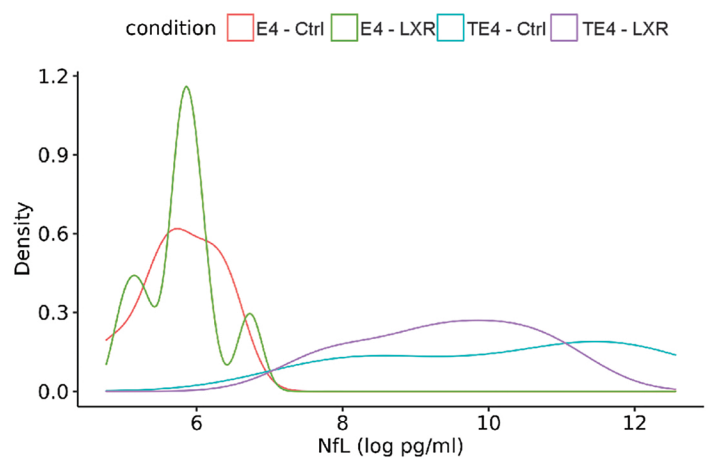

**G**

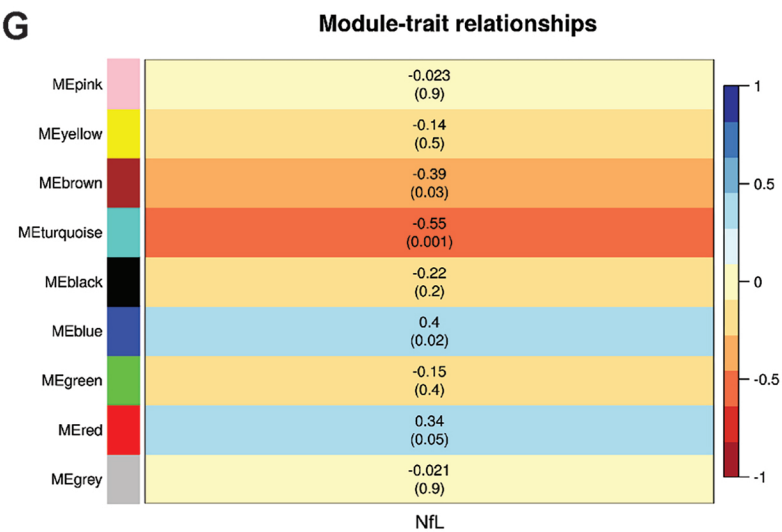

**H**

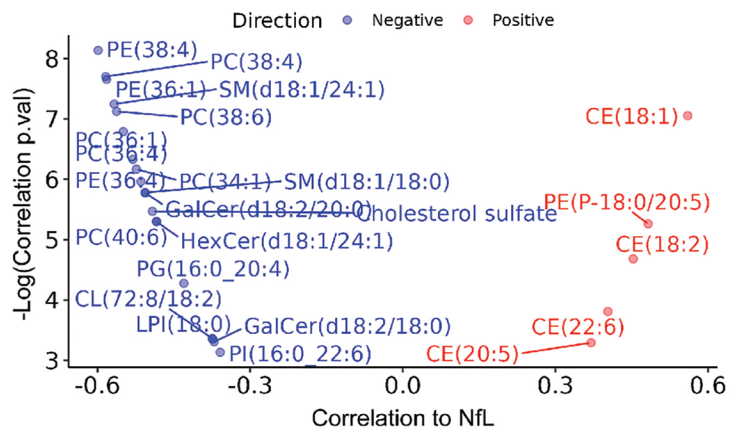



**Fig.S9**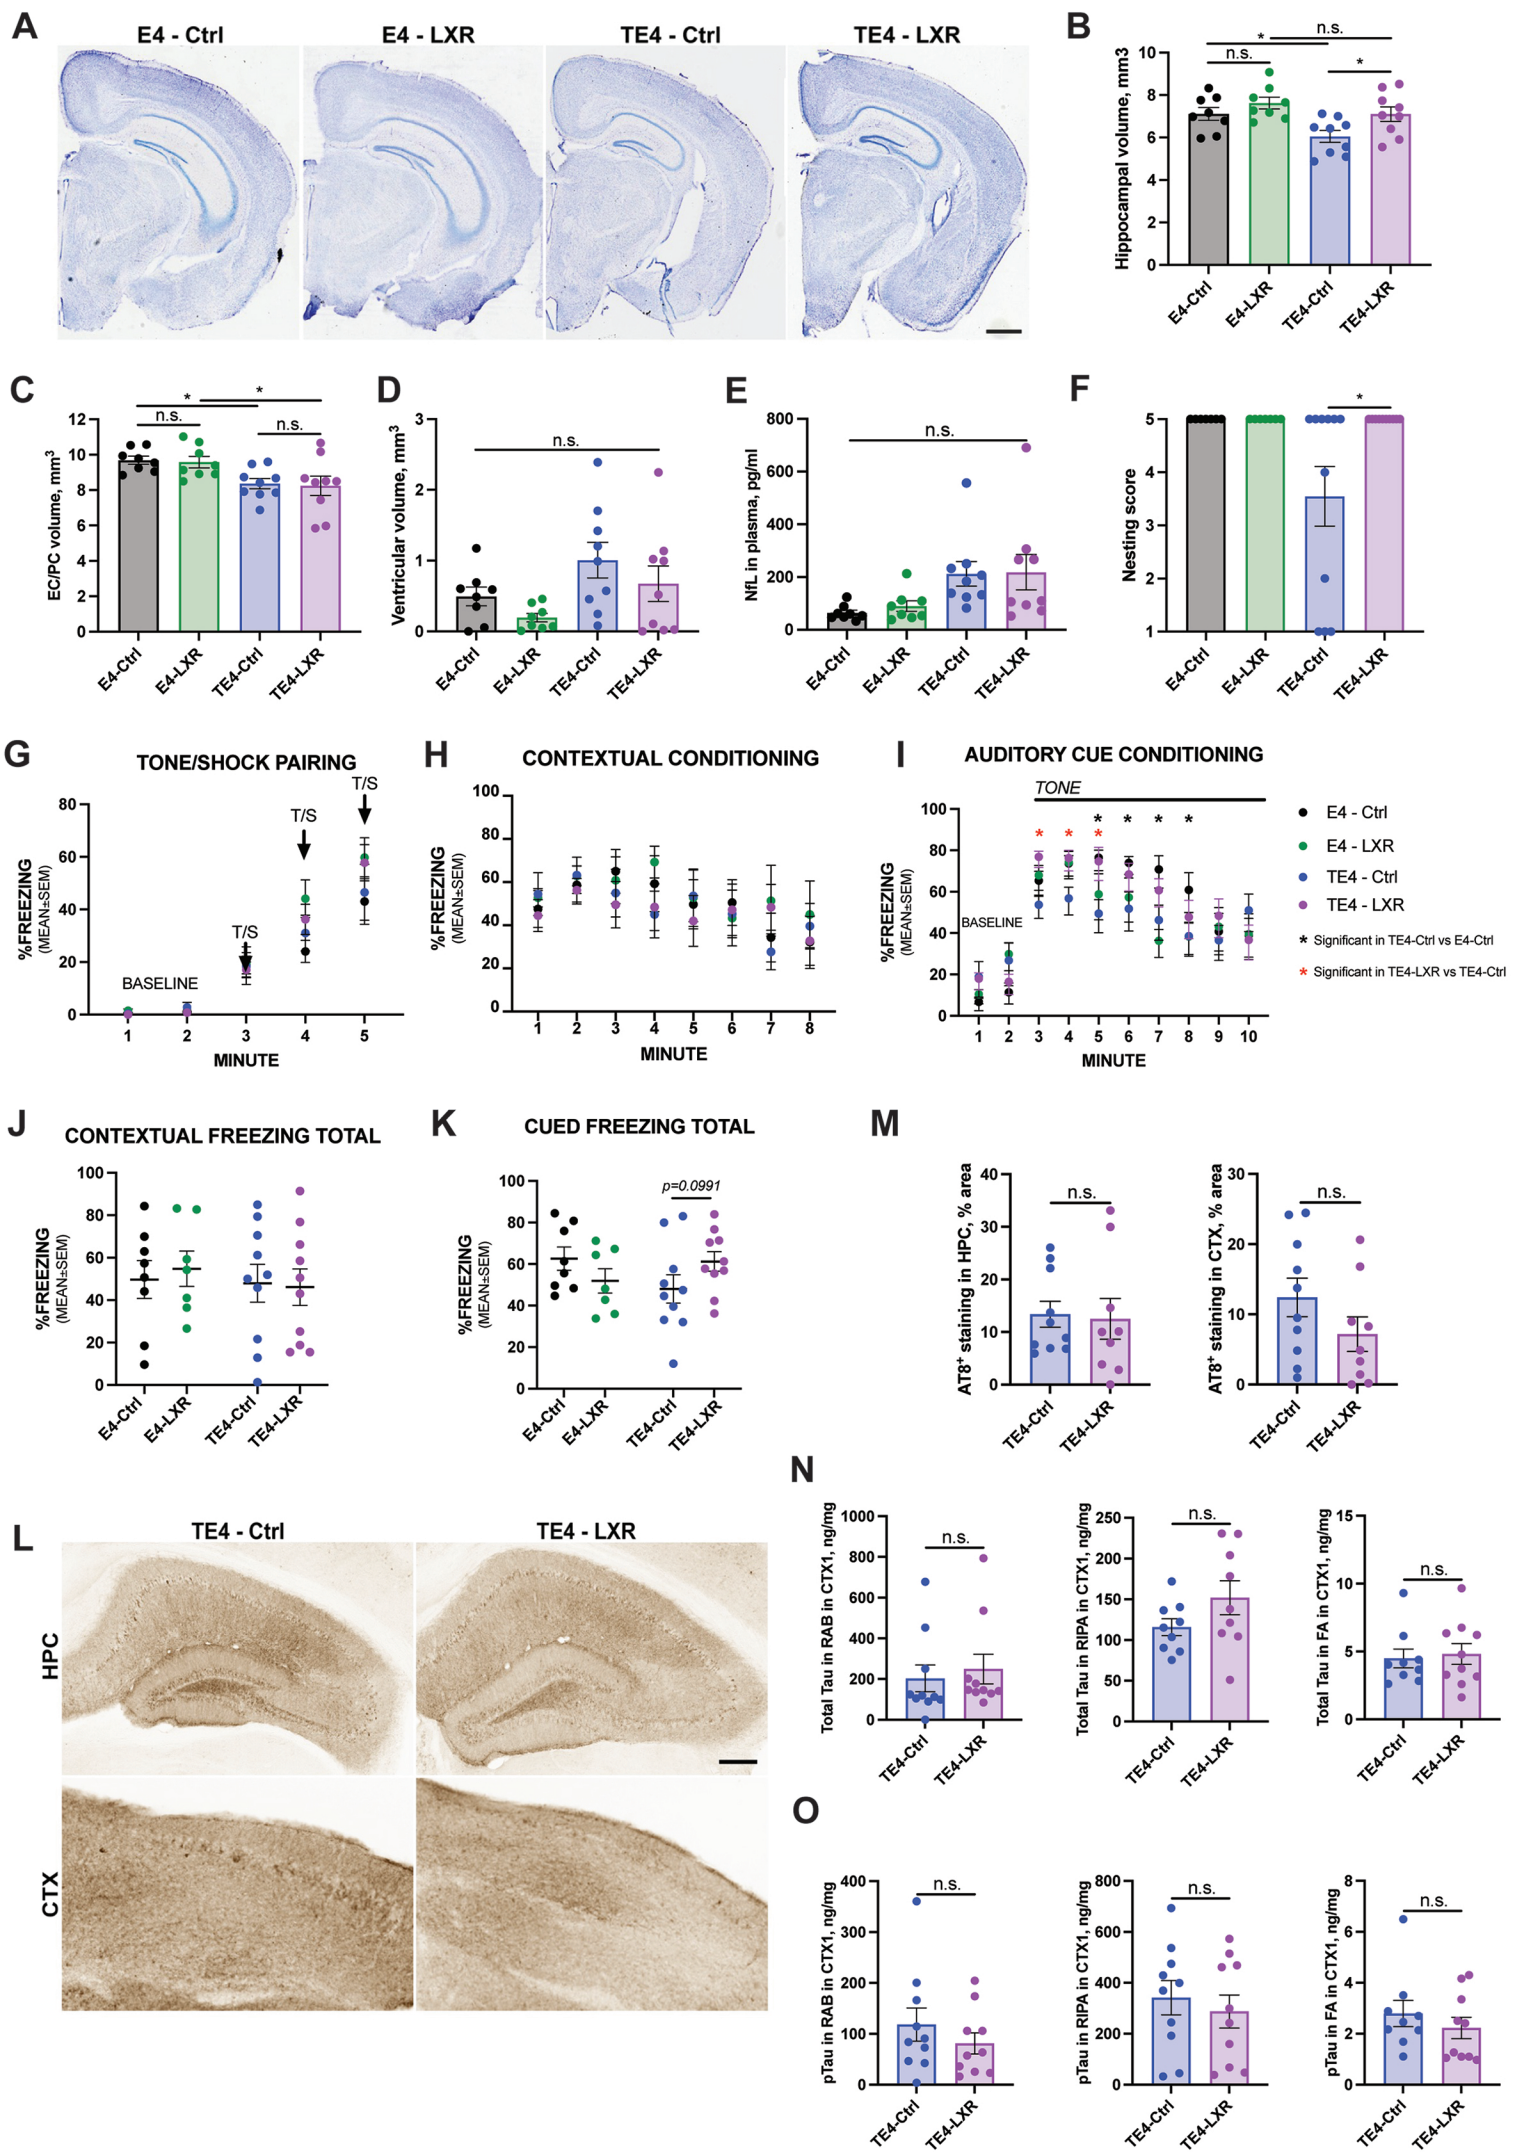

**Fig.S10****A**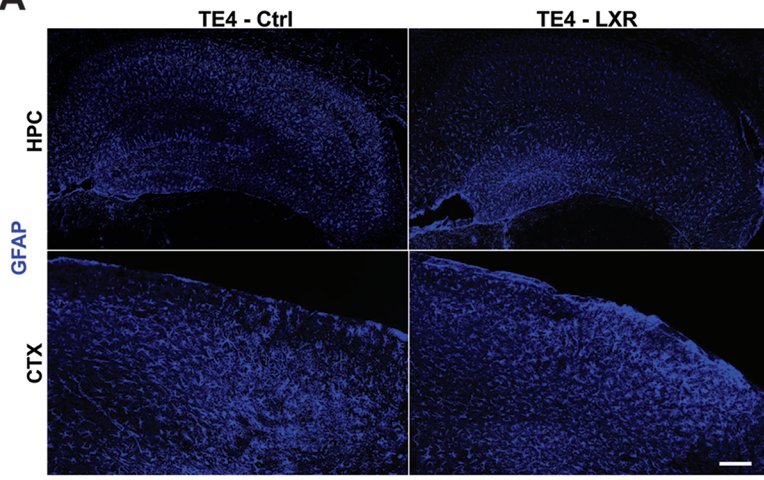**B**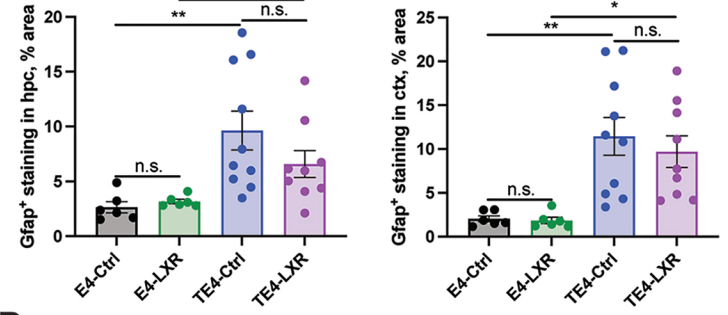**D**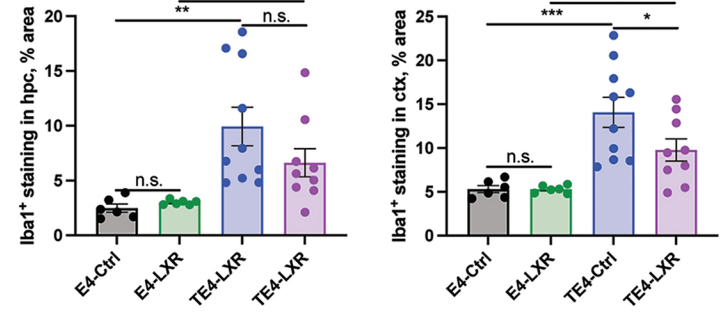**F**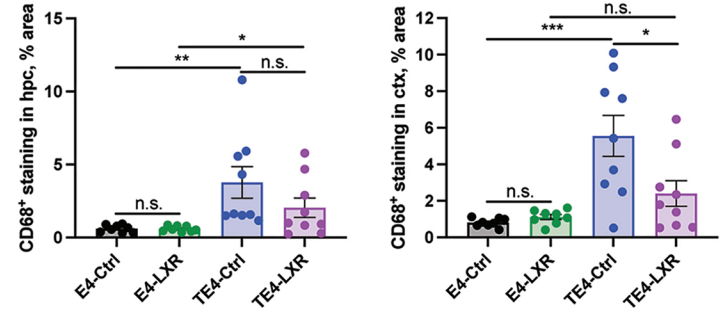**F**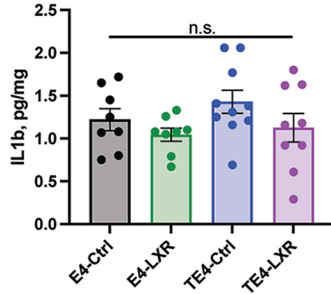**G**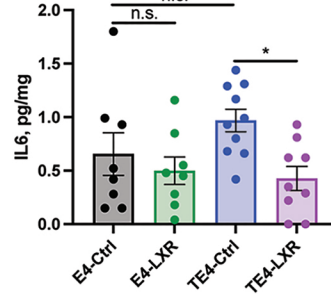**H**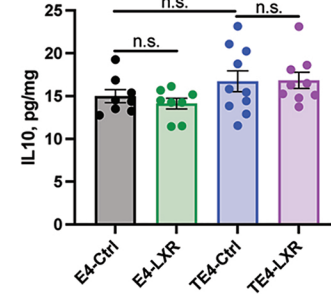**I**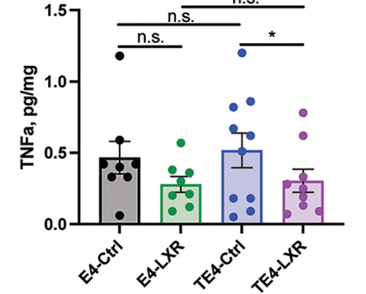**J**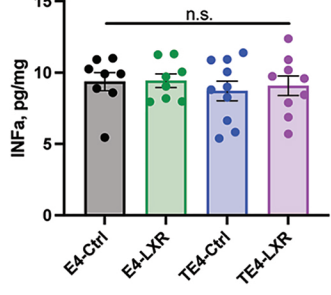**K**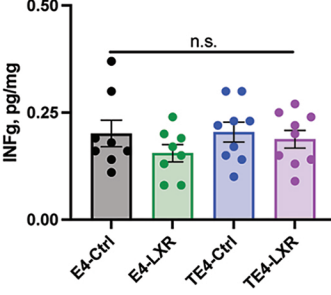**L**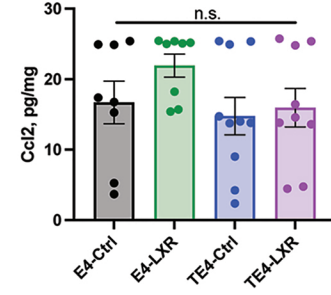**M**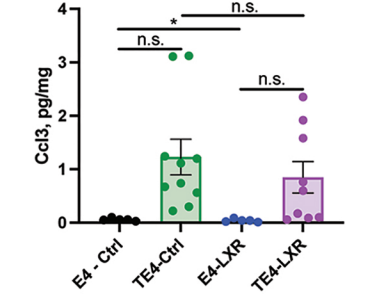**N**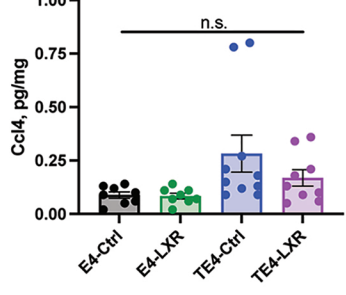**O**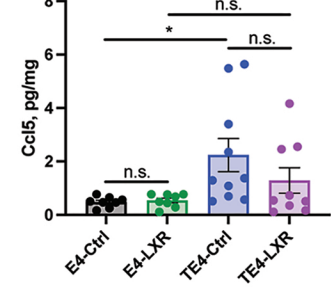**P**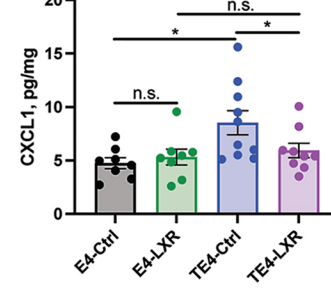**Q**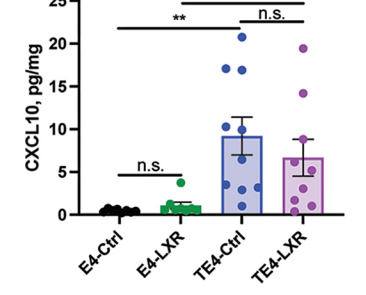



**Fig.S11**

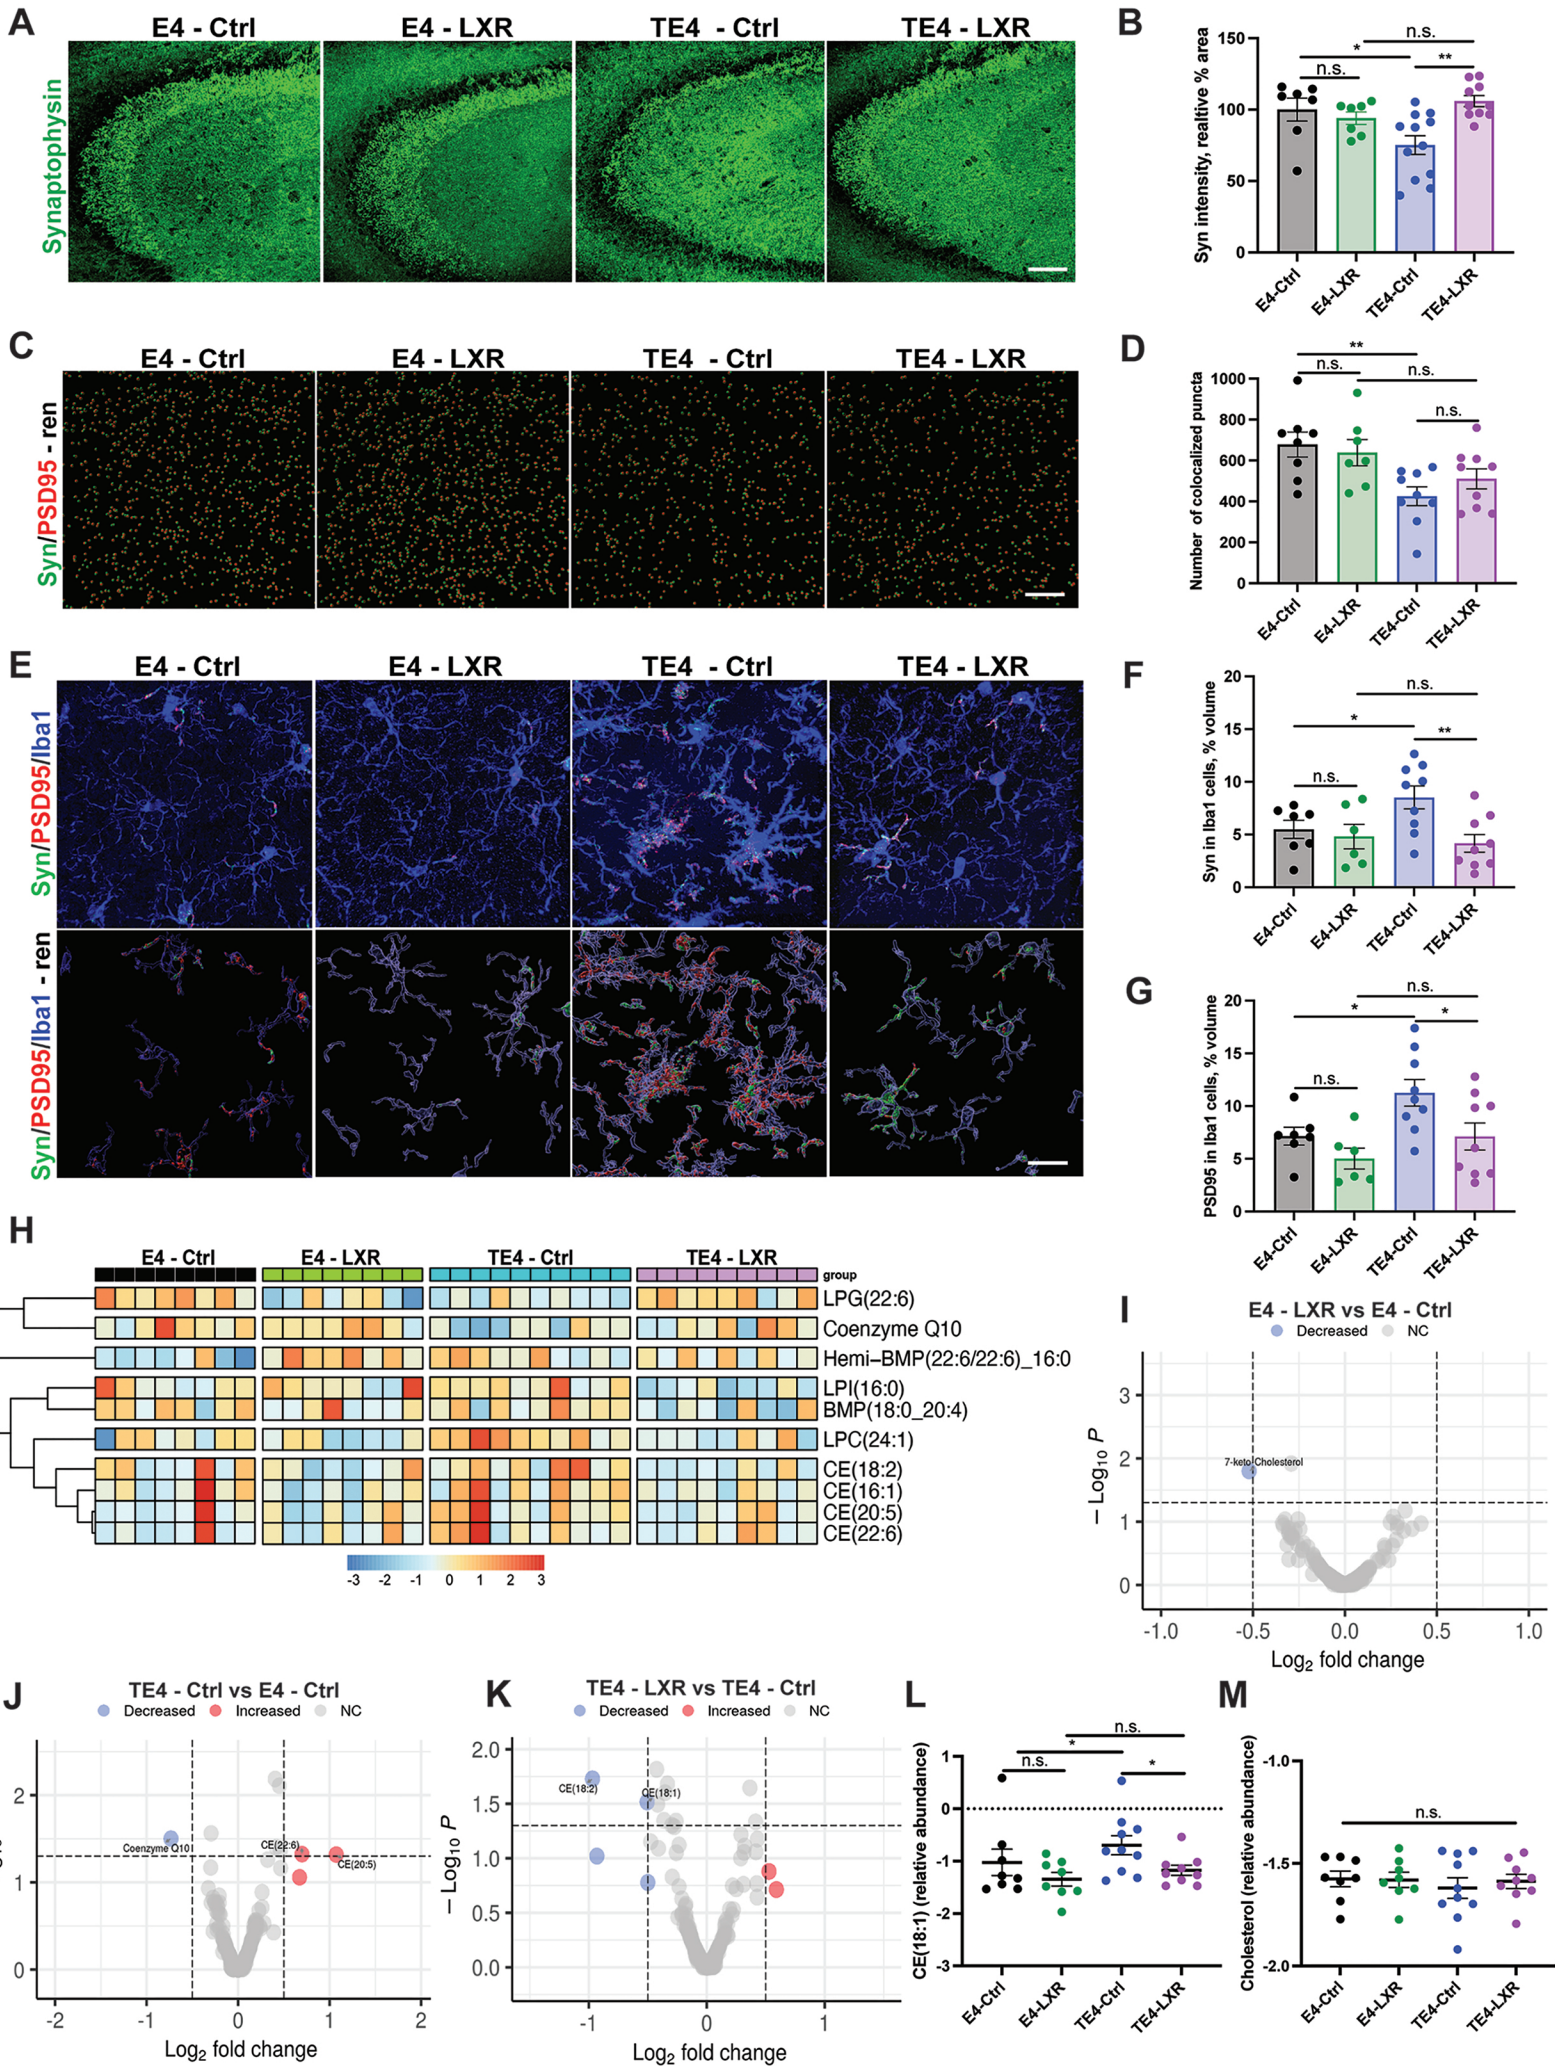

**Fig.S12**

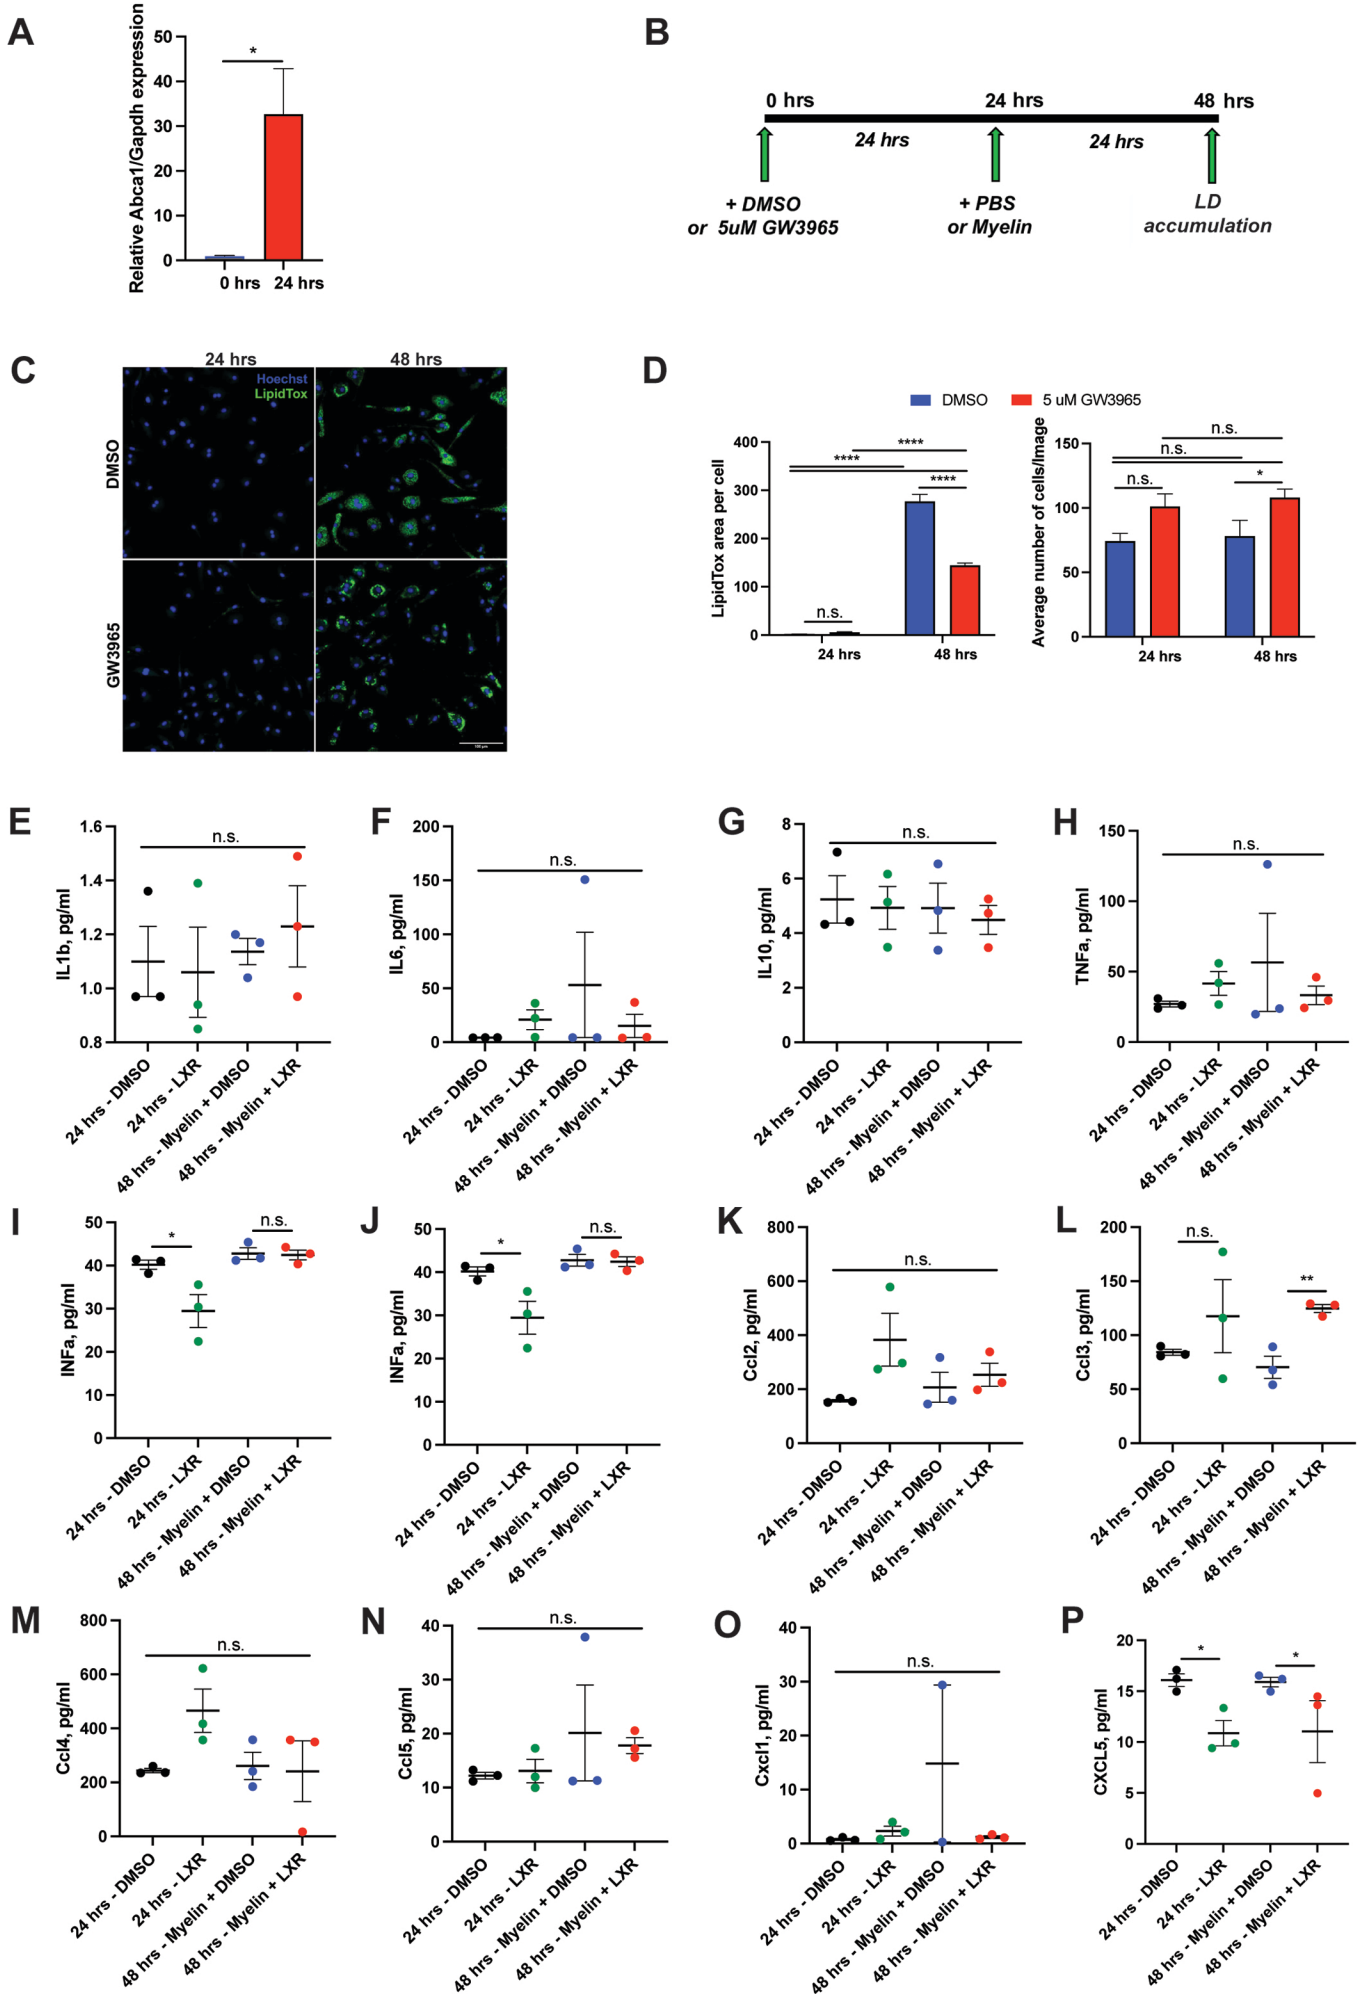

**Fig.S1. Related to Fig.1 and 2. Forebrain lipidomic analysis in 9.5-month-old mice.**

(A) Schematic diagram of lipidomics/FACS-coupled with lipidomics experiment. (B) Number of significantly altered lipids detected in E3 vs. EKO; E4 vs. EKO; E4 vs. E3; TEKO vs. EKO; TE3 vs. E3; TE4 vs. E4; ((TE4 vs. E4) vs (TE KO vs. EKO)); ((TE3 vs. E3) vs (TEKO vs. EKO)); ((TE4 vs. E4) vs (TE3 vs. E3)) mice. (C) Volcano plot of differentially abundant lipids in E3 vs. EKO mice. (D) Volcano plot of differentially abundant lipids in E4 vs. EKO mice. (E-F) Concordance analysis of differentially abundant lipids in (E4 vs. EKO) vs. (E3 vs. EKO). (G) Volcano plot of differentially abundant lipids in TE3 vs. E3 mice. (H) Volcano plot of differentially abundant lipids in TEKO vs. EKO mice. (I) Volcano plot of differentially abundant lipids in TE3 vs. TEKO mice. (J) Volcano plot of differentially abundant lipids in TE4 vs. TE3 mice. N=12 (6M and 6F)/genotype.  $p < 0.05$ .  $\text{Log}_2\text{FC} > 0.5$ . 181 variables detected.

**Fig.S2. Related to Fig.1 and 2. Lipidomic analysis in forebrain tissues and in FACS-isolated astrocytes and microglia in 9.5-month-old mice.**

(A-B) Concordance analysis of differentially abundant lipids in (TE3 vs. E3) vs (TEKO vs. EKO). (C-E) Concordance analysis of differentially abundant lipids in (TE4 vs. E4) vs (TEKO vs. EKO). (F) Heatmap of significantly changed lipids in FACS-isolated astrocytes from 9.5-month-old EKO and TEKO, E3 and TE3, E4 and TE4 mice. (G) Heatmap of significantly changed lipids in FACS-isolated astrocytes from 9.5-month-old EKO and TEKO, E3 and TE3, E4 and TE4 mice. N=12 (6M and 6F)/genotype.  $p < 0.05$ .  $\text{Log}_2\text{FC} > 0.5$ . 181 variables detected. R square test in C-E.

**Fig.S3. Related to Fig.2. E06-positive oxidized lipid accumulation in 9.5-month-old mice.**

(A) Representative E06 (green), Iba1 (red) and GFAP (blue) co-immunostaining in hippocampus of 9.5-month-old mice. (B) Quantification of E06 signal within GFAP-positive astrocytes. (C) Quantification of E06 signal within Iba1-positive microglia. (D) Correlation between the level of BODIPY staining in Iba1-positive microglia and hippocampal (left), piriform/entorhinal cortex (middle), and ventricular (right) volumes. (E) Correlation between the level of E06 staining in GFAP-positive astrocytes and hippocampal (left), piriform/entorhinal cortex (middle), and left ventricle (right) volumes.

(F) Correlation between the level of E06 staining in Iba1-positive microglia and hippocampal (left), piriform/entorhinal cortex (middle), and left ventricle (right) volumes. \* $p < 0.05$ ; \*\*  $p < 0.01$ ; N.S. – non-significant. One-way ANOVA in B-C. R square test in D-F.

**Fig.S4. Related to Fig.3. LXR agonist GW3965 treatment in 9.5 and 7.5 month old P301S/ApoE4 (TE4) mice.** (A) Schematic diagram of treatment of ApoE4 (E4) and P301S/ApoE4 (TE4) mice with LXR agonist GW3965 from 6 to 9.5 months. (B) Relative Abca1, Abcg1, Abca7 and hAPOE mRNA expression in hippocampus of 9.5-month-old ApoE4 mice treated from 6 to 9.5 months with control or GW3965 (LXR) diets. (C-D) Abca1 protein levels (C) with quantification (D) in 9.5-month-old mice. (E) Representative Cresyl Violet staining of dentate gyrus (DG) neurons. (F-G) Quantification of DG neuronal layer volume (F) and thickness (G). (H) Correlation of NfL levels in plasma with hippocampal (left), cortical (middle), and ventricular (right) brain volumes. (I) Schematic diagram of treatment of ApoE4 (E4) and P301S/ApoE4 (TE4) mice with LXR agonist GW3965 from 6-7.5 months. (J) Relative Abca1 mRNA expression in hippocampus of 7.5 months old ApoE4 mice treated from 6 to 7.5 month with control or GW3965 (LXR) diets. Male mice. Scale Bar in E: 50uM. \* $p < 0.05$ ; \*\*\*\*  $p < 0.0001$ ; N.S. – non-significant. Student's T-Test in B, D, J. One-Way ANOVA in F and G. R square test in H.

**Fig. S5. Related to Fig.4. LXR agonist GW3965 treatment reduces T cells numbers and cytokine/chemokine levels in 9.5-month-old TE4.** (A) Number of Gfap<sup>+</sup> cells in hippocampus of 9.5-month-old TE4 mice on Ctrl vs LXR diet. (B) Number of Iba1<sup>+</sup> cells in hippocampus of 9.5-month-old TE4 mice on Ctrl vs LXR diet. (C) Representative CD8 (green) and Iba1 (red) co-immunostaining with DAPI in dentate gyrus (DG) of 9.5-month-old TE4 mice. (D) Quantification of number of DAPI and CD8-positive/Iba1-negative T cells in (A). (E-G) Correlation of number of CD8-positive T cells with hippocampal (E), DG volumes (F), and level of BODIPY staining in hippocampal microglia (G). (H-S) Levels of cytokines/chemokines in hippocampus of 9.5-month-old mice. Each dot represents one animal: N (E4 – Ctrl) = 15; N (E4 – LXR) = 15; N (TE4 - Ctrl) = 18; N (TE4-LXR) =21.

Male mice. Scale bar in A: 50  $\mu$ m. \* $p < 0.05$ ; \*\*  $p < 0.01$ ; \*\*\*  $p < 0.001$ . N.S. – non-significant. Student's T-test in A-B, D. R square test in E-G. One-way ANOVA in H-S.

**Fig.S6. Related to Fig.6. Bulk and snRNAseq analysis in 9.5-month-old TE4 mice.**

(A) PCA analysis of gene expression changes in ApoE4 and P301S/ApoE4 (TE4) vs. ApoE4 (E4) mice treated with control (Ctrl) or GW3965 (LXR) diet from 6 to 9.5 months. P.adj.  $< 0.05$ . N(E4/treatment) =5; N(TE4/treatment) =10. Male mice. (B) Venn Diagram representing number of DEGs identified with P.adj.  $< 0.05$ . (C) Heatmap for disease-associated astrocyte genes (DAA). (D) Heatmap for disease-associated microglia genes (DAM). (E) Heatmap demonstrating the expression of cell-type specific markers across 23 cell types identified by snRNAseq in 9.5-month-old E4 and TE4) mice treated with either control (Ctrl) or 10mg/kg GW3965 LXR agonist diet (LXR). (F) UMAP of 23 cell types identified by snRNAseq. (G) Proportion of 23 different cell populations by genotype/treatment. P.adj.  $< 0.05$ .

**Fig.S7. Related to Fig.6. Gene expression in astrocytes and microglia from snRNAseq analysis in 9.5-month-old TE4 mice.**

(A) UMAP of 2 astrocyte clusters identified by snRNAseq in 9.5-month-old ApoE4 and P301S/ApoE4 (TE4) mice treated with either control (Ctrl) or 10mg/kg GW3965 LXR agonist diet (LXR). (B) Proportion of 2 astrocyte clusters by genotype/treatment. (C) Volcano plot comparing DEGs between clusters 0 and 1. (D) Top 5 biological pathways (KEGG) enriched in Cluster 0. (E) Top 5 biological pathways (KEGG) enriched in Cluster 1. (F) UMAP of 6 microglial clusters identified by snRNAseq in 9.5-month-old ApoE4 and P301S/ApoE4 (TE4) mice treated with either control (Ctrl) or 10mg/kg GW3965 LXR agonist diet (LXR). (G) Proportion of 6 microglia clusters by genotype/treatment. (H) Volcano plot comparing DEGs between clusters 1 and 0. (I) Volcano plot comparing DEGs between clusters 2 and 0. (J) Volcano plot comparing DEGs between clusters 1 and 2. (K) Volcano plot comparing DEGs between clusters 3 and 2. (L) Top 5 biological pathways (KEGG) enriched in Cluster 0. (L) Top 5 biological pathways (KEGG) enriched in Cluster 1. (M) Top 5 biological pathways (KEGG) enriched in Cluster 2. (N) Top 5 biological pathways (KEGG) enriched in Cluster 3.



**Fig.S8. Related to Fig.7. Lipidomic analysis in 9.5-month-old TE4 mice treated with an LXR agonist GW3965.** (A) Number of significantly altered lipids detected in TE4-Ctrl vs. E4-Ctrl; E4-LXR vs. E4-Ctrl; TE4-LXR vs. TE4-Ctrl; TE4-LXR v vs. E4-LXR; ((TE4-LXR vs. E4-LXR) vs. (TE4-Ctrl vs. E4-Ctrl)) mice. (B-D) Concordance analysis of differentially abundant lipids in (TE4-LXR vs. TE4-Ctrl) vs. (TE4-Ctrl vs. E4-Ctrl). (E) NfL levels in plasma of 9.5-month-old ApoE4 and TE4 mice on control vs. LXR diets used for lipidomics analysis. N=8/group. Male mice. (F) Correlation between lipid levels in forebrain and NfL levels in plasma of 9.5-month-old mice. (G) WLCNA modules of brain lipid to NfL plasma correlations. Turquoise module shows strong correlation with NfL levels in plasma. R value – top, P-value in brackets. (H) Correlation analysis between lipid abundance in brain and NfL levels in plasma. P.adj. <0.05.

**Fig. S9. Related to Fig.3. LXR agonist GW3965 treatment reduces neurodegeneration, improves behavior and reduces phospho-Tau levels in 7.5 month old TE4 mice.** (A) Representative Cresyl Violet staining of brain sections from 7.5 month old E4 and TE4 mice treated with either control (Ctrl) or 10mg/kg GW3965 LXR agonist diet (LXR) from 6 to 7.5 months. (B-D) Quantification of hippocampal (B), entorhinal/piriform (EC/PC) cortical (C) and ventricular volumes in 7.5 month old mice (D). (E) Neurofilament light chain (NfL) levels in plasma of 7.5 month old mice. (F) Nesting behavior score in 7.5 months old mice. 0 – no nestlets used. 1 - <10% nestlets used. 2 – 20-50% nestlets used. 3 – 50-90% nestlets used. 4 - <10% nestlets unused. 5 – 100% nestlets used. (G-K) Fear Conditioning in 7-7.5 month old mice: Tone/Shock pairing (G); Contextual Conditioning over 8 min and Total Contextual Freezing (H and J); Auditory Cued Conditioning over 10 min and Total Cued Freezing (I and K). (L) Representative immunohistochemical staining of AT8 phospho-tau in hippocampus (hpc) and cortex (ctx) of 7.5 month old mice. (M) Quantification of AT8 signal in hippocampus and cortex. (N)

Total tau levels in cortical RAB, RIPA and FA fractions. (O) Phospho-tau (AT8) levels in cortical RAB, RIPA and FA fractions. Each dot represents one animal: N (E4 – Ctrl) = 7; N (E4 – LXR) = 7; N (TE4 - Ctrl) = 11; N (TE4-LXR) =9. Male mice. Scale Bar in A: 1 mm; L: 100 um. \*p<0.05; N.S. – non-significant. One-way ANOVA in B-E. Chi-square test in F. Two-way ANOVA in J-K. Significant genotype-treatment interaction with p=0.0119 in (K). Student's T-Test in M-O.

**Fig. S10. Related to Fig.4. LXR agonist GW3965 treatment reduces microglial activation and cytokine/chemokine levels in 7.5 month old TE4.** (A) Representative GFAP immunostaining in hippocampus (hpc) and cortex (ctx) of 9.5-month-old E4 and TE4 mice treated with either control (Ctrl) or 10mg/kg GW3965 LXR agonist diet (LXR) from 6 to 7.5 months. (B) Quantification of (A). (C) Representative CD68 (green) and Iba1 (red) co-immunostaining in hippocampus (hpc) and cortex (ctx). (D-E) Quantification of Iba1 (D) and CD68 staining in (C). (F-Q) Levels of cytokines/chemokines in hippocampus of 7.5 month old mice. Each dot represents one animal: N (E4 – Ctrl) = 7; N (E4 – LXR) = 7; N (TE4 - Ctrl) = 11; N (TE4-LXR) =9. Male mice. Scale bar in A: 100 um. Male mice. Scale bar in A and C: 100 um. \*p<0.05; \*\* p<0.01; \*\*\* p<0.001. N.S. – non-significant. One-way ANOVA.

**Fig. S11. Related to Fig.5. LXR agonist GW3965 treatment reduces synaptic loss and forebrain lipid accumulation in 7.5 month old TE4 mice.** (A and B) Representative synaptophysin immunostaining in CA3 area of hippocampus from 7.5 month old E4 and TE4 mice treated with either control (Ctrl) or 10mg/kg GW3965 LXR agonist diet (LXR) from 6 to 7.5 months and its quantification (B). (C-D) Representative 3D-rendering of co-localized synaptophysin (Syn) and PSD95 puncta in CA3 area of hippocampus and quantification of co-localized puncta in (D). (E) Representative synaptophysin (Syn, green) and PSD95 (red) inside Iba1-positive microglia (blue) from 7.5 old mice with 3D-rendering. (F-G) Quantification of synaptophysin (Syn) (F) and PSD95 (G) volumes within Iba1-positive microglia. (H) Heatmap of significantly changed lipids in forebrains of 7.5

month old E4 or TE4 mice. (I) Volcano plot of differentially abundant lipids in E4-LXR vs. E4-Ctrl mice. (J) Volcano plot of differentially abundant lipids in TE4-LXR vs. E4-LXR mice. (K) Volcano plot of differentially abundant lipids in TE4-LXR vs. TE4-Ctrl mice. (L) Relative levels of CE (18:1) in forebrains of 7.5 old mice. (M) Relative levels of free cholesterol in forebrains of 7.5 old mice. Each dot represents one animal: N (E4 – Ctrl) = 7; N (E4 – LXR) = 7; N (TE4 - Ctrl) = 11; N (TE4-LXR) =9. Male mice. Scale bar in A: 100 um; C: 5 um; E: 10um. \*p<0.05; \*\* p<0.01; N.S. – non-significant. One-way ANOVA in B-G, M-N. P.adj. generated by R Statistical package for all lipids detected in lipidomic profiling analysis in H-L.

**Fig.S12. Related to Fig.8. LXR agonist GW3965 decreases lipid droplet accumulation in primary E4 microglia.** (A) Relative Abca1 mRNA expression in primary E4 microglia treated with 5uM GW3965 or DMSO for 24 hrs. (B) Schematic diagram of myelin uptake experiment. (C) Representative images of LipidTox-positive lipid droplets in E4 microglia pre-treated with DMSO/GW3965 and exposed to myelin for 0 or 24 hrs (timepoints 24 and 48 hrs in myelin uptake). (D) LipidTox area per cell (left) and average number of cells per image analyzed (right) (timepoints 24 and 48 hrs in myelin uptake). (E-P) Levels of cytokines/chemokines in conditioned media from E4 microglia pre-treated with DMSO/GW3965 and exposed to myelin for 0 or 24 hrs (myelin uptake). \*p<0.05; \*\* p<0.01; \*\*\* p<0.001; \*\*\*\* p<0.0001. N.S. – non-significant. (A) Student's t-test in A and E-P. Two-way ANOVA in D.
